# Supplementary material for: Single-cell and spatial transcriptomics uncovers the role of senescent vascular cells in pathological arterial remodeling during murine atherosclerosis
Source: Research Square preprint supplement (doi:10.21203/rs.3.rs-4282827/v1), 2024-10-29
Supplement: Supplementary file 1 [file 0653dd34ae22b54db1806425.xlsx]

## Sheet: SenMayo
HFD	Core enrichment
Cl 0	Spp1, Mmp3, Serpine2, Igfbp7, Cxcl12, Angptl4, Mmp2, C3, Ctsb, Tnfrsf11b, Mmp14, Cxcl16, Serpine1, Igfbp3, Cd9, Tnfrsf1a, Ctnnb1, Gem, Esm1, Icam1, Hmgb1, Angpt1, Hgf, Csf2rb
Cl 2	Spp1, Mmp3, Igfbp7, C3, Ctsb, Serpine2, Gem, Mmp2, Tnfrsf11b, Igf1, Ccl5, Angptl4, Igfbp4, Jun, Fgf1, Cxcl16, Cd9, Ptbp1, Ccl8, Igfbp3
Cl 3	Spp1, Cd9, Igfbp7, Gmfg, Lcp1, Nap1l4, Hmgb1, Serpine2, Selplg, Ctsb, Ccl12, Mmp2, Plaur, Ccl2, Ccl5
Cl 9	Spp1, Cd9, Ctsb, Ccl5, Lcp1, Cxcl16, Ccl8, Igfbp7, Mmp14, Cxcl2, Ccl12, Timp2, Igf1, Axl, Ccl2, Ccl4, Mmp12, Il1b, Serpine2, Igfbp4, Tnf, Jun, Cxcl12, Igfbp5, Csf2rb, Mmp3, Ccl3, Egfr, Csf1, Plau, Icam1, Plaur, Il15, Tnfrsf1a, Tnfrsf11b, Il18, Ccl7
Cl 12	Spp1, Tnfrsf11b, Serpine2, Igfbp7, Serpine1, Mmp2, Cd9, Ctnnb1, Hgf, Fgf2, Icam1, Ctsb, Jun, Fas, Mmp12, Acvr1b, Ereg, Bmp2, Ccl2, Plau, Cxcl1, Ets2, Angpt1, Plaur, Tnfrsf1a, Gdf15, Il6, Fgf1
Cl 15	Spp1, Ccl4, Ctsb, Cxcl2, Ccl3, Ccl2, C3, Jun, Tnf, Cd9, Serpine2, Acvr1b, Csf1, Ctnnb1, Fas, Mmp3, Vegfa, Ccl8, Itga2, Il1a, Plau, Cd55
Cl 16	Cxcl10, Spp1, Igfbp4, Tnf, Ctsb, Igfbp7, Lcp1, Gmfg, Mmp3, Serpine2, Selplg, Il15, Egfr, Tnfrsf26, Csf2, Hmgb1, Cd9, Kitl, Icam1, Ccl12, Tnfrsf1a, Ccl5, Cxcl12, Tnfrsf11b, Igfbp6, Tubgcp2
Cl 20	Spp1, Ctsb, Il1b, Mmp12, Cxcl2, Kitl, Lcp1, Ccl8, Plaur, Plau, Il15, Tnfrsf1a, Csf2rb, Ets2, Hgf, Igf1, Cxcl16, Vegfa, Csf2rb2, Cd9, Ccl3, Mmp14
Cl 21	Ccl2, Areg, Tnfrsf1a, Csf2, Csf1, Iqgap2, Edn1, Angpt1, Nap1l4, Spp1, Gem, Il2, Plaur, Igfbp3, Ang, Cd55, Fas, Rps6ka5, Cd9, Ccl5, Tnf, Serpine2, Itga2, Csf2rb, Il6st, Ccl1, Ets2, Ctsb, Il15, Tubgcp2, Bmp6, Icam1, Ccl7
Cl 27	Igfbp7, Serpine2, Iqgap2, Angptl4, Mmp2, Cxcl12, Pappa, Cxcl10, Gmfg, Cd9, Ptbp1, Rps6ka5, Serpine1, Pecam1, Il15, Tnfrsf1a, Ccl2, Egfr, Acvr1b, Lcp1, Kitl, Itga2
HFD + ABT-737	Core enrichment
Cl 0	Cd55, Egfr, Ets2, Hmgb1, Esm1, Cd9, Csf2rb, Ctsb, Gem, Il6st, Cxcl16, Ctnnb1, Igfbp4, Serpine1, Igfbp6, Tnfrsf11b, Igfbp7, Mmp2, Mmp3, Angpt1, Timp2, Serpine2, Spp1
Cl 2	C3, Igfbp3, Cxcl12, Angptl4, Jun, Igfbp6, Vegfc, Lcp1, Tnfrsf1a, Cd55, Cxcl1, Hgf, Plaur, Fas, Mmp3, Igfbp5, Iqgap2, Gmfg, Cxcl2, Icam1, Mmp14, Il18, Il6st
Cl 3	Mmp2, Ccl2, Hmgb1, Angpt1, Timp2, Ctsb, Plaur, Ccl5, Fas, Ccl12, Igfbp6, Mmp3, Serpine2, Igfbp5, C3, Spp1, Gmfg, Il6st, Lcp1, Nap1l4, Igfbp7, Cd9
Cl 9	Ctnnb1, Ccl3, Plau, Ccl24, Mmp3, Icam1, Ccl12, Kitl, Igfbp5, Csf1, Csf2rb, Iqgap2, Egfr, Il6st, Tnf, Cxcl12, Mmp12, Pecam1, Igfbp4, Il1b, Igf1, Serpine2, Ccl8, Cxcl2, Axl, Mmp14, Timp2, Igfbp7, Cxcl16, Lcp1, Ccl5, Cd9, Ctsb, Spp1
Cl 12	Selplg, Plau, Hmgb1, Mmp2, Cd9, Axl, Serpine1, Gdf15, Bmp2, Iqgap2, Kitl, Igfbp3, Mmp14, Plat, Timp2, Mmp12, Ptbp1, Ctnnb1, Igfbp7, Gem, Spp1, Jun, Igf1, Serpine2, Igfbp5, Tnfrsf11b
Cl 15	Ccl4, Ccl3, Plau, Il1b, Rps6ka5, Acvr1b, Mmp3, Igfbp7, Ccl8, Igfbp5, Hmgb1, C3, Fas, Il6, Ccl2, Ctnnb1, Serpine2, Iqgap2, Itga2, Hgf, Csf1, Spp1
Cl 16	Lcp1, Igfbp5, Timp2, Icam1, Kitl, Mmp3, Selplg, Rps6ka5, Igfbp6, Serpine2, Il15, C3, Cd9, Spp1, Egfr, Igfbp4, Igfbp7, Cxcl10
Cl 20	Vegfa, Ctnnb1, Selplg, Iqgap2, Igfbp4, Mmp14, Icam1, Il18, Ccl24, Csf2rb, Mmp12, Hgf, Nap1l4, Csf2rb2, Axl, Lcp1, Plau, Ccl8, Kitl, Ctsb, Plaur, Il15, Il1b, Spp1
Cl 21	Spp1, Lcp1, Fas, Igf1, Il6st, Pecam1, Ang, Nap1l4, Rps6ka5, Tubgcp2, Cd9, Ccl5, Igfbp3, Igfbp5, Angpt1, Edn1, Csf1, Il2, Iqgap2, Tnfrsf1a, Csf2, Areg
Cl 27	Angpt1, Hmgb1, Vegfc, Il15, Ctnnb1, Fas, Tnfrsf1a, Axl, Kitl, Ccl2, Tubgcp2, Acvr1b, Angptl4, Egfr, Igfbp5, Selplg, Itga2, Serpine1, Pecam1, Rps6ka5, Mmp3, Lcp1, Iqgap2, Mmp2, Cxcl12, Gmfg, Timp2, Serpine2, Igfbp7

## Sheet: CellAge
HFD	Core enrichment
Cl 0	Mmp3, Lum, Sparc, Igfbp7, Col8a1, Angptl4, Isg15, Gas6, Lox, Ifit3, Ifit1, C3, Gpnmb, Ctsb, Npc2, Ctsd, Ifitm3, App, Ifi27, Htra1, Tspan11, Glmp, Itgb5, Fth1, Stat1, Thbs1, Txnip, Grn, Dhrs3, Dnajb9, Dab2, Mxra7, Gabarap, Igfbp3, Cald1, Vkorc1, Ctsz, Pam, Ctsa, Tmem45a, Asah1, Dkk3, Atp6v0c, Samd9l, Ccnd2, Reep5, Saraf, Serinc3, Mfge8, Lrp1, Ptprk, Lmcd1, Icam1, Angpt1, Tmem59, Fuca1, Bri3, Lrpap…
Cl 2	Mmp3, Lum, Sparc, Fth1, Igfbp7, Col8a1, C3, Gas6, Ctsb, Htra1, Fn1, Itm2b, Ctsd, Ifitm3, Prickle2, Tmem45a, Fat1, Rin2, Fndc3b, Itgb5, Thbs1, Npc2, Scg2, Dhrs3, Arhgef3, Mapre3, Ptprk, Mxra7, Ctsz, Stat1, Ifit1, Tmem59, Angptl4, Mylk, Arl15, Dhrs7, Slc25a4, Sulf1, Cpq, Atp2b4, Lrp1, Itgav, Tmem127, Ifit3, Igip, Pcnx, Tmtc1, Ptprm, Tsc22d1, Itpripl2, Ndrg1, Glmp, Herc6, Ell2, Cpped1, Slc20a2, Cmya…
Cl 6	Cdkn1a, Ifitm3, Isg15, Ifit2, Ifit1, Stat1, Ifit3, Cxcl10, Lum, Sparc, Ccnd2, Samd9l, Ctsd, Prnp, Tnfsf10, Mmp3, Selenow, Fn1, Ifih1, Ifi27, Serinc3, Tsc22d1, Fth1, Bri3, Sp110, Rras, Filip1l, Itm2b, Ypel5, Saraf, Fas, Angptl4, Map1lc3b, Gabarap, Sat1, Cav2, Rrm2b, Igfbp7, Tpm1, Ctsb, Tmem59, Ndrg1, Dnajb9, Dhrs1, Lrpap1, Coq10b, Atp6v1g1, Atp6v0c, Pink1, Ormdl3, Tprgl, Znfx1, Tmem47, Fbxo6, Glmp…
Cl 7	Isg15, Ctsd, Ctsz, Fth1, Atp6v0c, Ctsb, Grn, Fn1, Npc2, Inpp5d, Itm2b, Serinc3, App, Mmp12, Arhgef3, Hexb, Itgb5, Map1lc3b, Ifitm3, Dhrs3, Reep5, Creg1, Atp6v1a, Atp6v1g1, Ctsa, Sat1, Zfand5, Cited2, Selenow, Fndc3b, Grina, Plcb4, Cpq, Syt1, Asah1, Anxa4, Txnip, Ifi27, Hdac9, Emc7, Bri3, Atp2b4, Itgav, Svil, Mpc2, Tspan13, Btg2, Atp6v0e, Cd81, Serinc1, Zbtb20, Hagh, Dab2, Mmp3, Adipor1, Fuca1, Ra…
Cl 9	Ctsb, Fth1, Ifitm3, Sparc, Grn, Ctsz, Ctsd, App, Cdkn1a, Hexb, Npc2, Fndc3b, Fn1, Dab2, Ctsa, Cd81, Itm2b, Igfbp7, Sat1, Lrp1, Atp6v0c, Inpp5d, Ccnd1, Gabarap, Cd36, Txnip, Timp2, Bri3, Serinc3, Ifi27, Mmp12, Creg1, Gm2a, Itgb5, Mfge8, Glrx, Anxa4, Syngr2, Asah1, Pea15a, Gpr137b, Samd9l, Lpcat2, Tapbp, Filip1l, Reep5, Atp6ap1, Atp6v0e, Lrpap1, Ccnd2, Itpripl2, Fuca1, Adam19, Cited2, Lum, Igfbp5, …
Cl 11	Ctsd, Thbs1, Ptprm, Fth1, Sipa1l1, Gpnmb, Atp6v0c, Ctsb, Gpr137b, Rai14, Zbtb20, Tgm2, Ccnd2, Dab2, Itgb5, Ctsz, Phtf2, Bpgm, Timp2, Arhgef3, Dhrs3, Cdkn1a, Hdac9, Grn, Sparc, Sh3pxd2a, Adam23, Cd81, Itfg1, Igf2r, Grina, Vps41, Bmt2, Mamdc2, Anxa4, Tspan13, Syngr1, Tmbim1, Tbc1d9, Ostm1, Lmbrd2, Gabarap, Pla2g15, Pea15a, Ctsa, Cav2, Ccnd1, App, Saraf, Atp2b4, Lum, Slc25a20, Daglb, Gdf15, Gde1, Pa…
Cl 12	Fn1, Sparc, Lum, Thbs1, Col8a1, Timp3, Igfbp7, Mfge8, Sulf1, Fndc3b, Fat1, Tsc22d1, Phtf2, Pam, Uchl1, Nuak1, Tmem45a, Rin2, Sox4, Htra1, Tgfb2, Npc2, Ell2, Dynlt3, Gpc1, Cpq, Rras, Ormdl3, Coq10b, Cited2, Ntn4, Dkk3, Hdac9, Igf2r, Fry, Ptprm, Gfpt1, Smurf2, Rai14, Stx12, Tmbim1, Lox, Lrp1, Ctsd, Cobll1, Nckap5, Fgf2, Adipor1, Itgb5, Anxa4, Icam1, Ddah1, Gadd45a, Lmbrd2, Dnajb9, P3h2, Tm2d1, Ctsb…
Cl 17	Fn1, Lum, Fth1, Ahnak2, Cnn1, Itgb5, Mmp3, Pam, Ifi27, Cryab, Ankrd1, Igfbp7, Ctsd, Tgm2, Ctsb, Svil, Ndrg1, Lmcd1, Bri3, Dkk3, Ccng1, Lox, Ctsa, App, Gas6, Dnajb4, Acyp2, Hdac9, Htra1, Tpm2, Rnd3, Gabarap, Fat1, Fhl1, Ubr3, Limch1, Rras, Atp6ap1, Cdkn1a, Mfge8, Ids, Timp2, Nexn, Sulf1, Map3k7cl, Grn, Cpq, Fndc3b, Atp6v1a, Sulf2, Cald1, Vkorc1, Map1lc3b, Thbs1, Creg1, Reep5, Emc7, Plxdc2, Hexb, L…
HFD + ABT-737	Core enrichment
Cl 0	Tlr3, Gnptg, Blcap, Tmbim1, Sil1, Pea15a, Ankrd29, Ano10, Zmat3, Dhrs1, Tmem131, Tmem45a, Abca3, Rnd3, Ncstn, Plekha1, Gba, Ak3, Hdac9, Ahcyl2, Atp6v0c, Wdr26, Armc9, Tmem9b, Prrg1, Slc44a2, P4ha2, Adam19, Enc1, Ormdl3, Samd9l, Btg2, Cav2, Vamp2, Mfge8, Cmya5, Saraf, Pcyox1, Dner, Chpf2, Gfpt1, Arrdc4, Fzd8, Ids, Ctsf, Bri3, Mras, Tpm2, Anxa4, Adam23, Dnajb4, Atg4a, Emc7, Mfsd1, Pgrmc2, Znfx1, Ac…
Cl 2	Tmem59, Mllt11, Pla2g4c, Lrp12, Ube2h, Cbx7, Nabp1, Tpm1, Cryl1, Slc43a2, Pip4k2c, Ginm1, Ak3, Cyb5d2, Zbtb20, Ccdc9b, P2rx5, Ahnak2, Zfyve1, Tgm2, Cnn1, Angpt1, Sgsh, Atp6v0a4, Blcap, Usp53, Rnd3, Serinc1, Armcx3, Sulf2, Gnptg, Ncstn, Man1b1, Ifit1, Pamr1, Asah1, Fgf2, Tmem131, Arrdc4, Lpcat2, Slc17a5, Vkorc1, Ubr3, Glmp, Fry, Rnf11, Itfg1, Tgfb2, Lrpap1, Bmt2, Cpped1, Cyp2u1, Dgka, Atg4a, Ell2,…
Cl 6	Dgka, Pgm2l1, Creg1, Plekha1, Atp6ap1, Ampd3, Dda1, Cav2, Frmd6, Ahnak2, Tmem30a, Atp2b4, Baiap2l1, Nabp1, Cryab, Taf13, Nrbp2, Stx12, Enc1, Otud1, Ncstn, Atp6ap2, Cyb561a3, Tmem59, Itfg1, Adam19, Ccdc9b, Selenom, Efemp1, Ifit3, Ormdl3, Txnip, Itgb5, Tpm1, Dhrs7, Tlr3, Nuak1, Nbeal1, Calcoco1, Sesn1, Zbtb4, Lmcd1, Gabarapl1, Anxa4, Tprgl, Glrx, Mylk, Zfyve1, Cald1, Daglb, Atp6v1a, Ifit1, Grn, Cd8…
Cl 7	Tpm1, Ndrg1, Ppp1r3c, Trpv2, Kif3c, Tmbim1, Limch1, Lox, Cdkn1a, Adam19, Ano10, Mast3, Tmem30a, Tnfrsf21, Mylk, Glmp, Slc25a45, Ifit3, Tango2, Igfbp3, Edil3, Ddb2, Cnnm2, Cyb561a3, Lmcd1, Slc25a20, Slc20a2, Glb1, Gpr155, Fbxo6, Gde1, Tmem9b, Sp110, Gls, Dnase1l1, Slc17a5, Tmtc1, L1cam, Cryab, Htra1, Dnajb4, Edem2, Gpr137b, Itpripl2, Nbeal1, Ostm1, Plekha1, Papss2, Itfg1, Tpm2, Crebrf, Lrp10, Pink…
Cl 9	Rnd3, Tctn3, Abca3, Epas1, Calcoco1, Tnfsf10, Lamb2, Mxra7, Cdh10, Dhrs3, Man1b1, Mamdc2, Sulf2, Rab11fip5, Wdr26, Rai14, Crebrf, Tgm2, Edil3, Sh3pxd2a, Pla2g15, Adipor1, Plscr4, Atp6ap2, Prnp, Armcx3, Arf4, Mapre3, Shc4, Kif3c, Map3k7cl, Trpv2, Riok3, Cpped1, Slc16a3, Tm7sf3, Vamp2, Slc25a4, Igf2r, Smpd1, Tmem106b, Ccng1, Akr1b3, Selenom, Manba, Atp6v1a, Tbc1d9, Selenow, Prss23, Mfsd1, Ogfrl1, D…
Cl 11	Mcoln1, Ids, Sugct, Mxra7, Sema6a, Wnt5a, Pink1, Crebrf, Ppp1r3c, Smpd1, Pam, Atp6v0e, Tango2, Ctsf, Sp110, Cd36, Usp53, Slc25a45, Dhrs1, Gnptg, Igfbp5, Tbc1d19, Cmya5, Creg1, Atp6v1a, Mdm2, Dynlt3, Slc20a2, Prps1, Slc43a2, Edil3, Zfyve1, Daglb, Tmbim1, Emc7, Lmbrd2, Lamb2, Ano10, Nabp1, Mmp12, Lamc1, Cyb5d2, Dda1, Rhbdd2, Pgrmc2, Pcyox1, Kcnj2, Ccnd1, Coq10b, Mast3, Ccng1, Fuca1, Mapre3, Slc35f5…
Cl 12	Mcoln1, Rrm2b, Cxcl10, Mxra7, Htra1, Plcb4, Cyp2u1, Prps1, Slc20a2, Dusp10, Cdkn2b, Pla2g15, Cln8, Atp6ap1, Pnrc1, Rhou, Rnd3, Taf13, Slc35f5, Fzd8, Ogfrl1, Glb1, Prnp, Syngr2, Retsat, Stc1, Itgb5, Filip1l, Dhrs3, Aox1, Sox4, Cap2, Mapre3, Cryl1, Serinc1, Ifi27, Emc7, Praf2, Rnf103, Baiap2l1, Tmem131, Flnc, Dkk3, Saraf, Btc, Cited2, Tmem9b, Herc6, Lox, Fgf2, Gls, Ctsd, Cercam, Mxd4, Dusp3, Usp53,…
Cl 17	Papss2, Lmcd1, Dkk3, Wnt5a, Optn, Lamc1, Stx12, Gpr155, Ube2h, Adam23, Btc, Fndc4, Sp110, Sort1, Lox, Sesn1, Kctd16, Tm2d1, Cnnm2, Kif3c, Cpped1, Mras, Sh3pxd2a, Arl15, Herc6, Lrp12, Man1b1, Acyp2, Cryab, Aplp1, Cyb5d2, Retsat, Ifit1, Sparc, Sugct, Slc16a3, Dab2, Pgrmc2, Tbc1d9, Atp6v1a, P3h2, Bsdc1, Flnc, Zbtb4, Tmem45a, Nexn, Pcnx, Tapbp, Creg1, Nbeal1, Filip1l, Fry, Igfbp3, Ak3, Itpripl2, Dda1…
