# Supplementary material for: Single-cell and spatial transcriptomics uncovers the role of senescent vascular cells in pathological arterial remodeling during murine atherosclerosis
Source: Research Square preprint supplement (doi:10.21203/rs.3.rs-4282827/v1), 2024-10-29
Supplement: Supplementary file 1 [file eea8847c0c49a84714a63776.pdf]

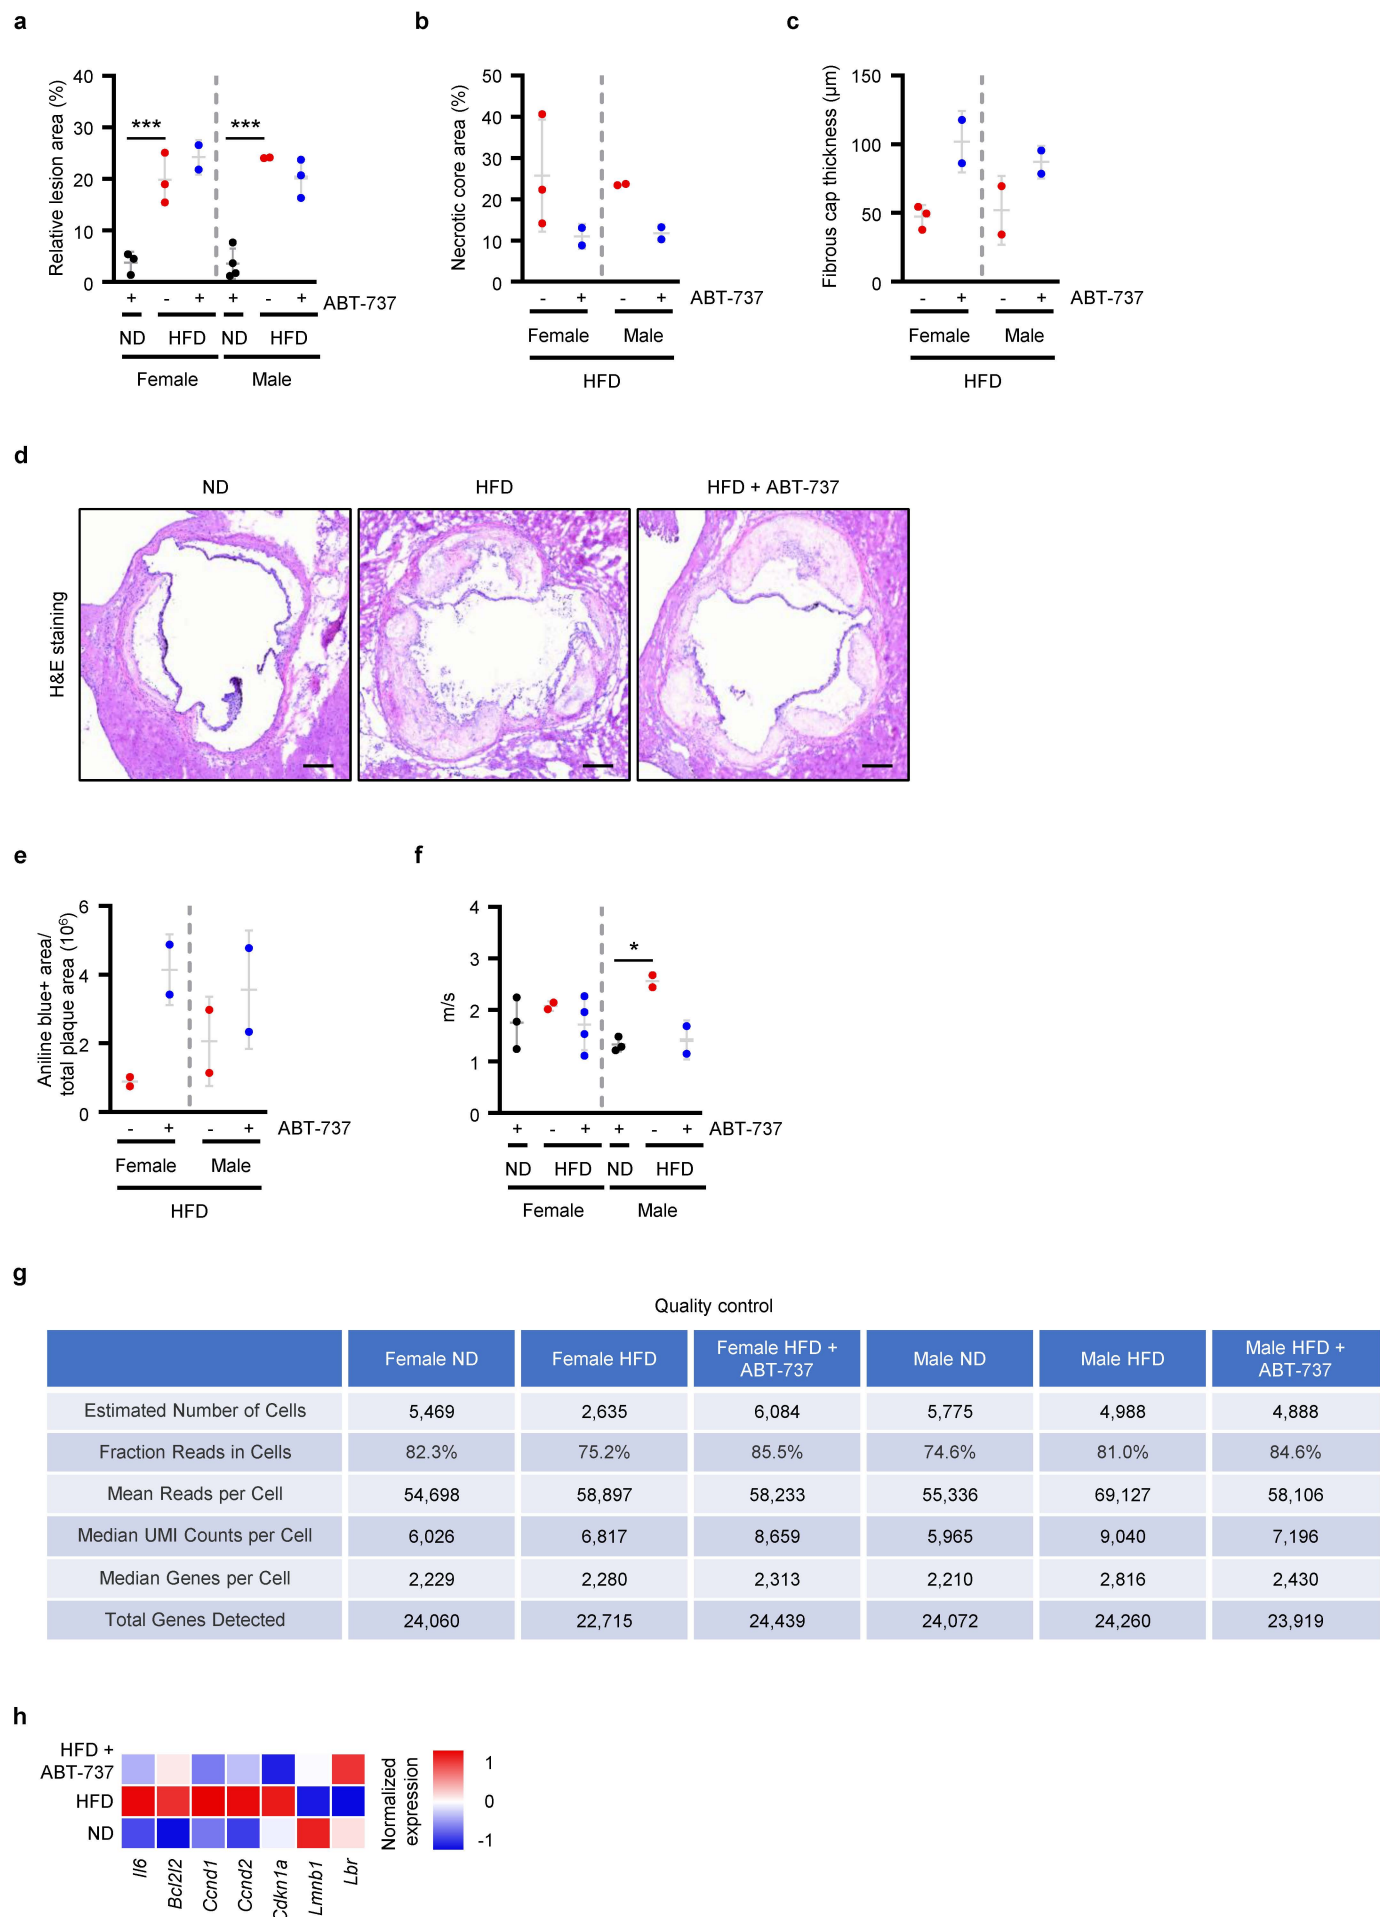

**Supplemental Fig. 1 | Atherosclerotic plaque pathology analysis and quality control analysis. a,** Quantification of plaque size presented by sex and condition (ND, HFD, and HFD + ABT-737). **b,** Quantification of necrotic core area presented by sex and condition (ND, HFD, and HFD + ABT-737). **c,** Quantification by plaque fibrous cap thickness presented by sex and condition (ND, HFD, and HFD + ABT-737). **d,** Representative H&E staining of aortic roots from ND, HFD, and HFD + ABT-737. The scale bar is 200  $\mu$ m. **e,** Quantification of collagen fibers (Aniline blue) area / area of aortic root presented by sex and condition (ND, HFD, and HFD + ABT-737). **f,** Pulse wave velocity (PWV) measurements presented by sex and condition (ND, HFD, and HFD + ABT-737). **g,** Quality control table of the scRNA-seq samples including estimated number of cells, fraction reads in cells, mean reads per cell, median UMI counts per cell, median genes per cell, and total genes detected. **h,** Heatmap of normalized expression levels of classical senescence associated mRNAs either enriched in HFD and reduced by ABT-737 treatment, or conversely, reduced by HFD and increased by ABT-737 treatment in mice (*Lmnb1* and *Lbr*). Significance was established using Two-Way ANOVA with multiple comparisons. \*,  $p \leq 0.05$ ; \*\*,  $p \leq 0.01$ ; \*\*\*,  $p \leq 0.001$ ; \*\*\*\*,  $p \leq 0.0001$ .

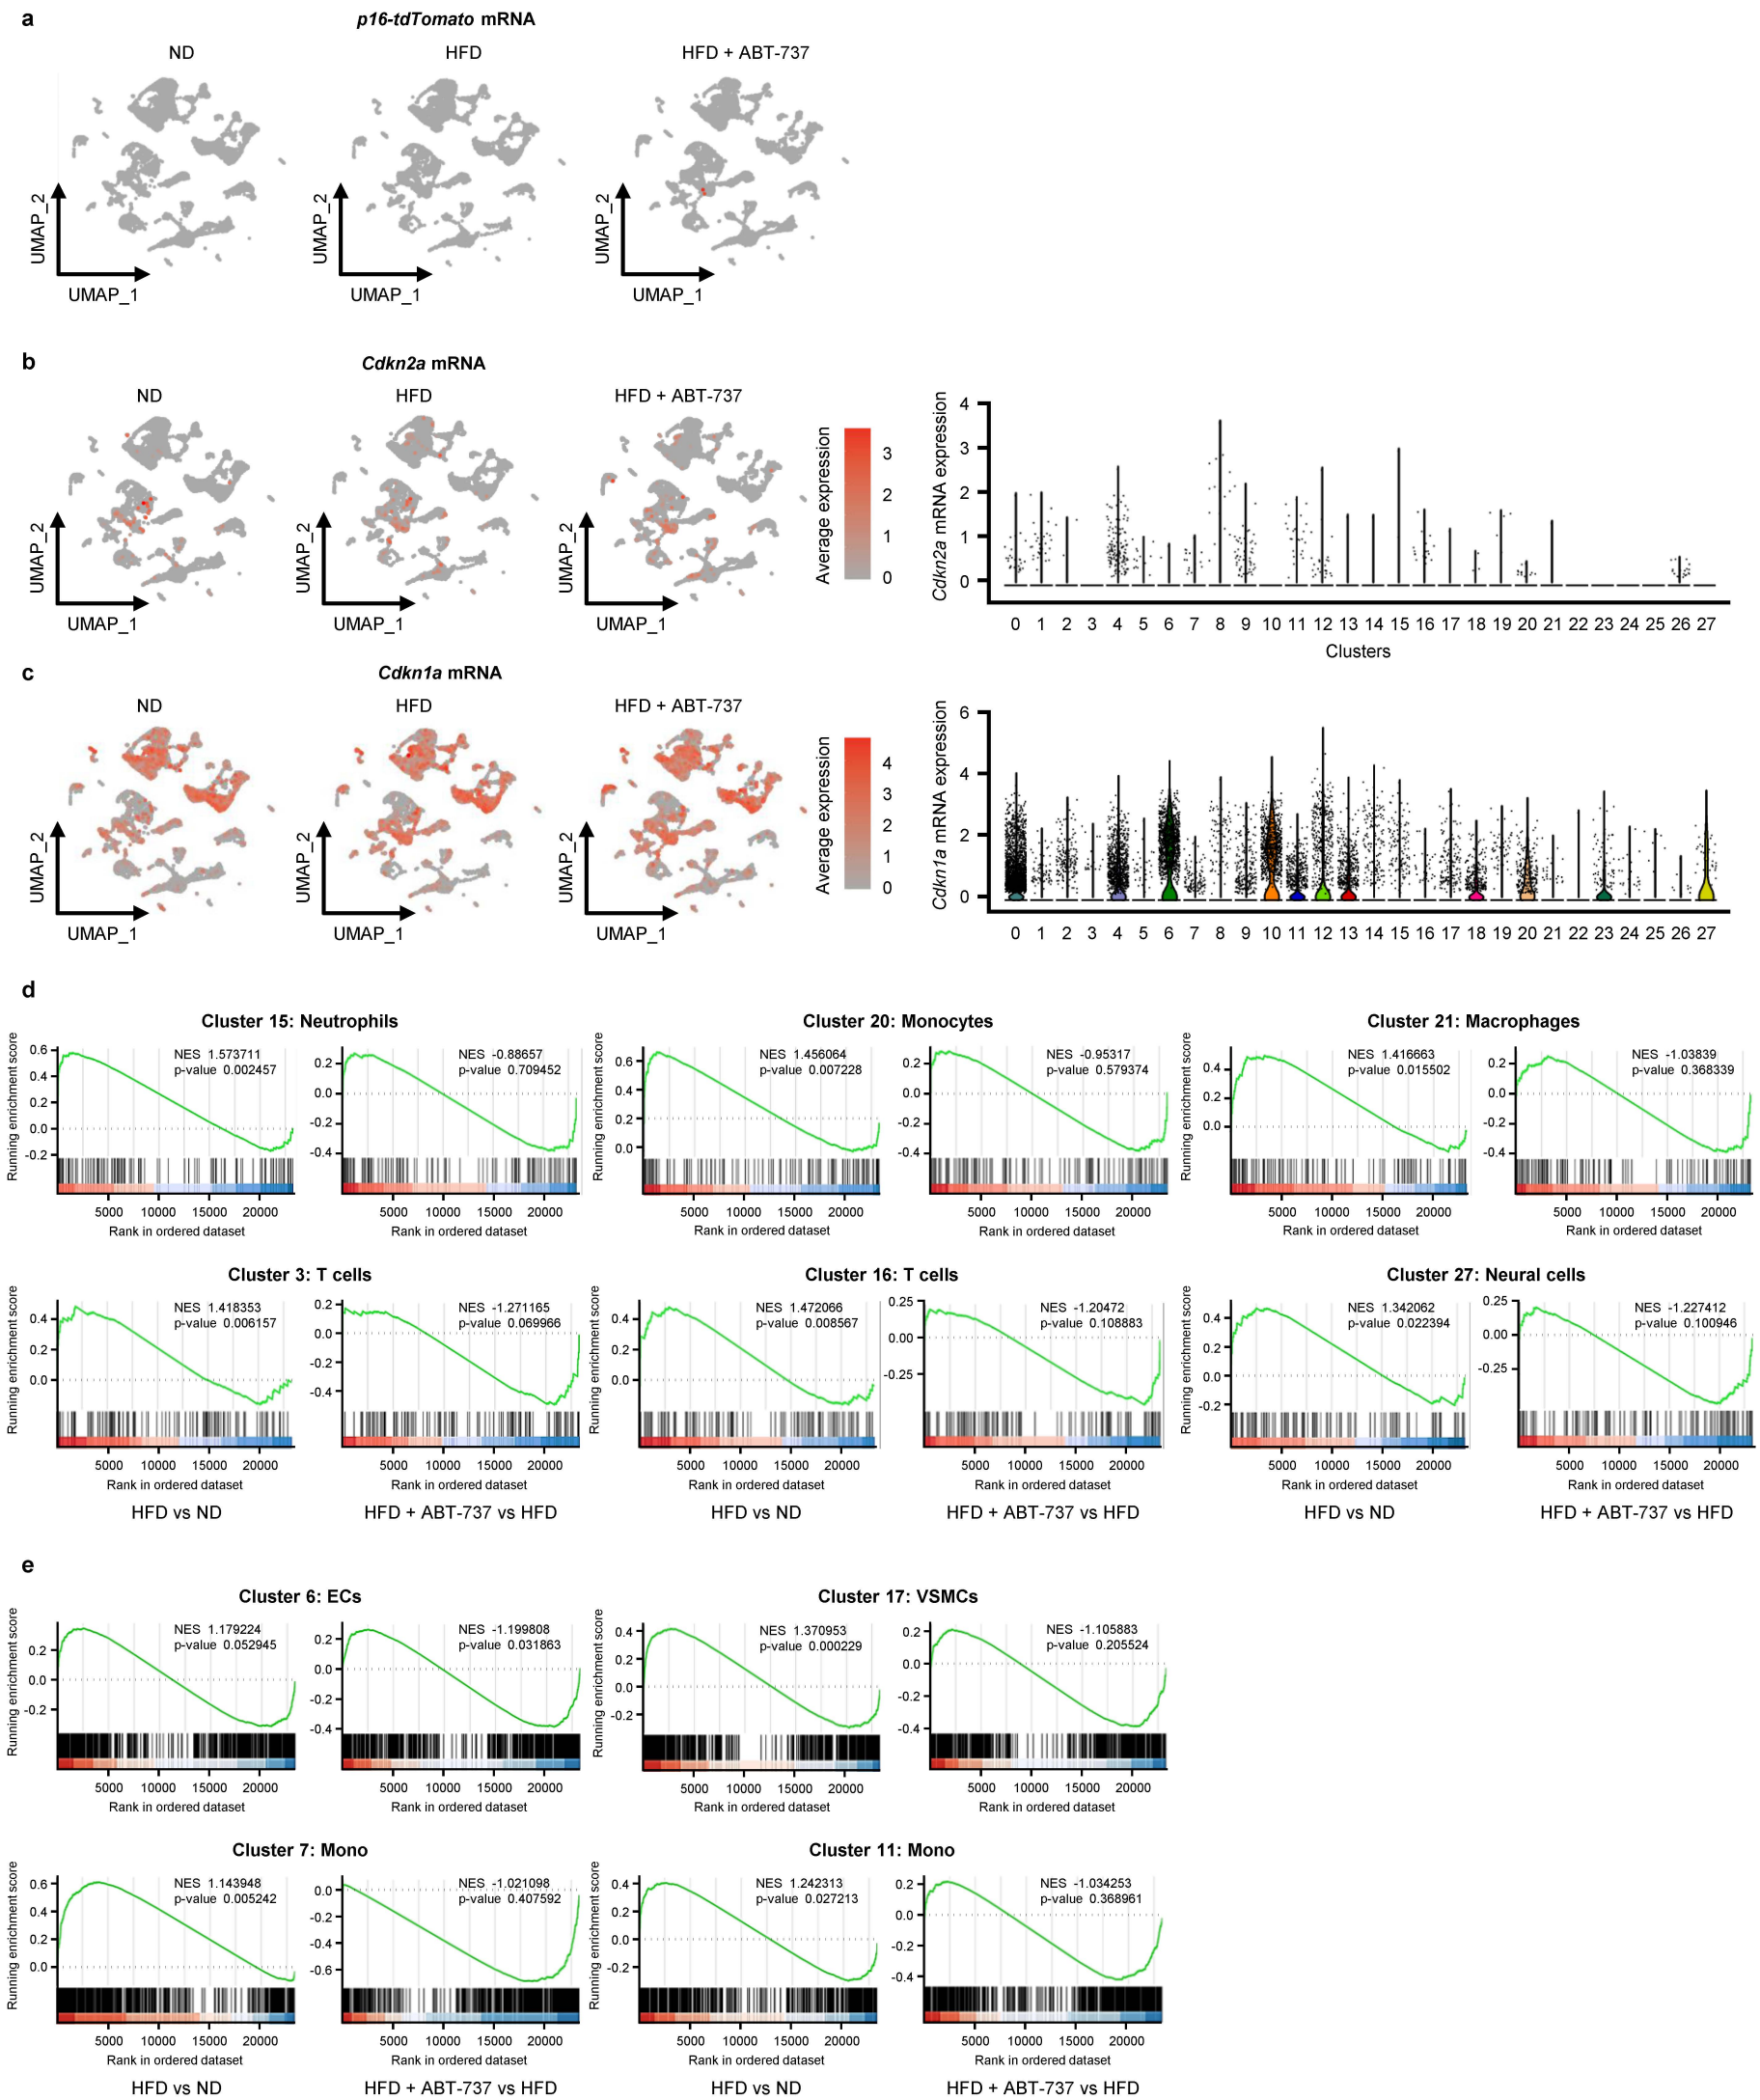

**Supplemental Fig. 2 | scRNA-seq analysis of senescence gene expression.** **a**, UMAPs of *p16-tdTomato* mRNA expression in ND, HFD, and HFD + ABT-737 treated mice. **b**, UMAP plot of *Cdkn2a* mRNA expression across all clusters and conditions (*left*). Violin plot of *Cdkn2a* mRNA expression across all clusters (*right*). **c**, UMAP plot of *Cdkn1a* mRNA expression across all clusters and conditions (*left*). Violin plot of *Cdkn1a* mRNA expression across all clusters (*right*). **d**, GSEA SenMayo plots comparing HFD vs ND and HFD + ABT-737 vs HFD for Clusters 15,20, 21, 3, 16, and 27. **e**, GSEA CellAge plots comparing HFD vs ND and HFD + ABT-737 vs HFD for Clusters 6, 17, 7, and 11.

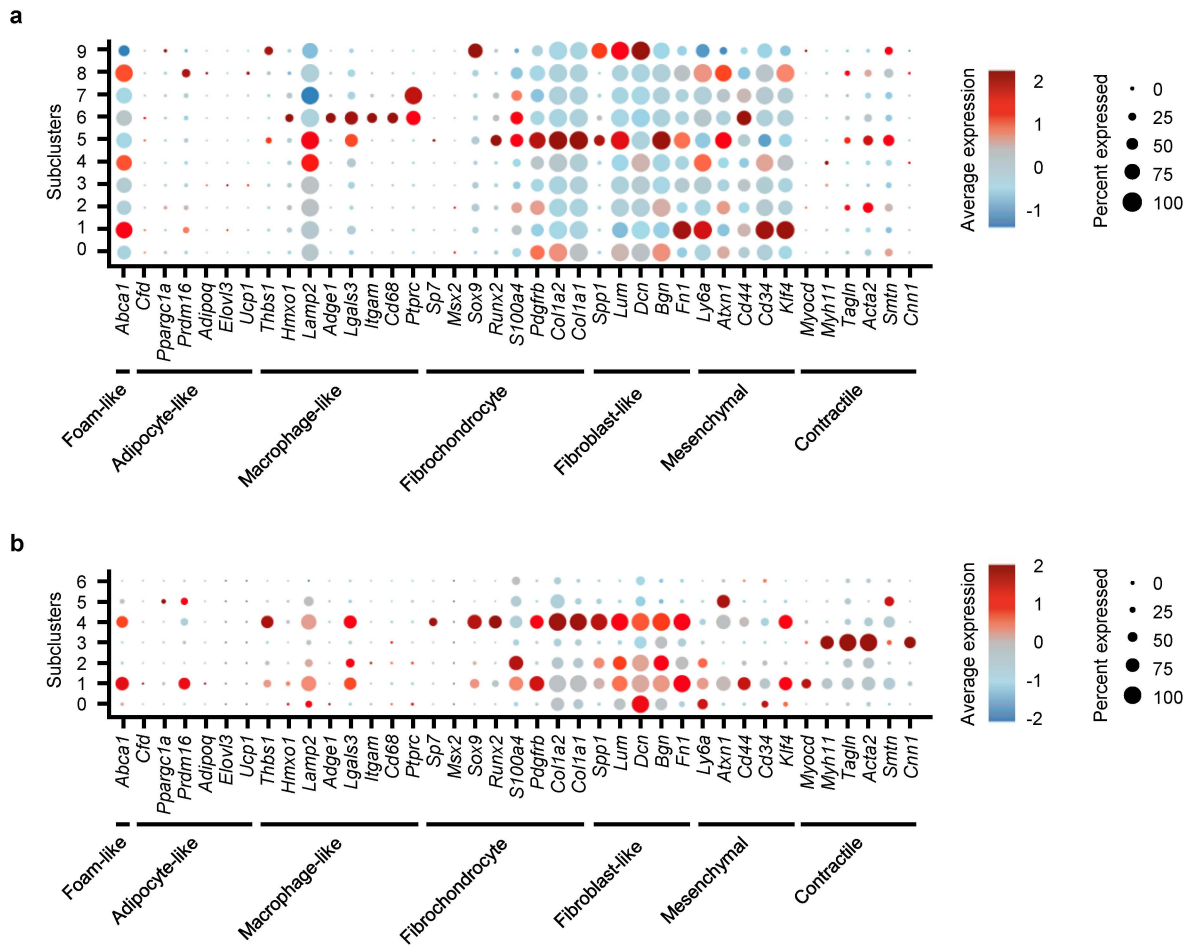

**Supplemental Fig. 3 | VSMC phenotype analysis.** **a**, Dot plot representation of the gene expression profile for VSMC phenotype mRNA markers for Cluster 0 subclustered VSMCs. **b**, Dot plot representation of the gene expression profile for VSMC phenotype mRNA markers for Cluster 12 subclustered VSMCs.



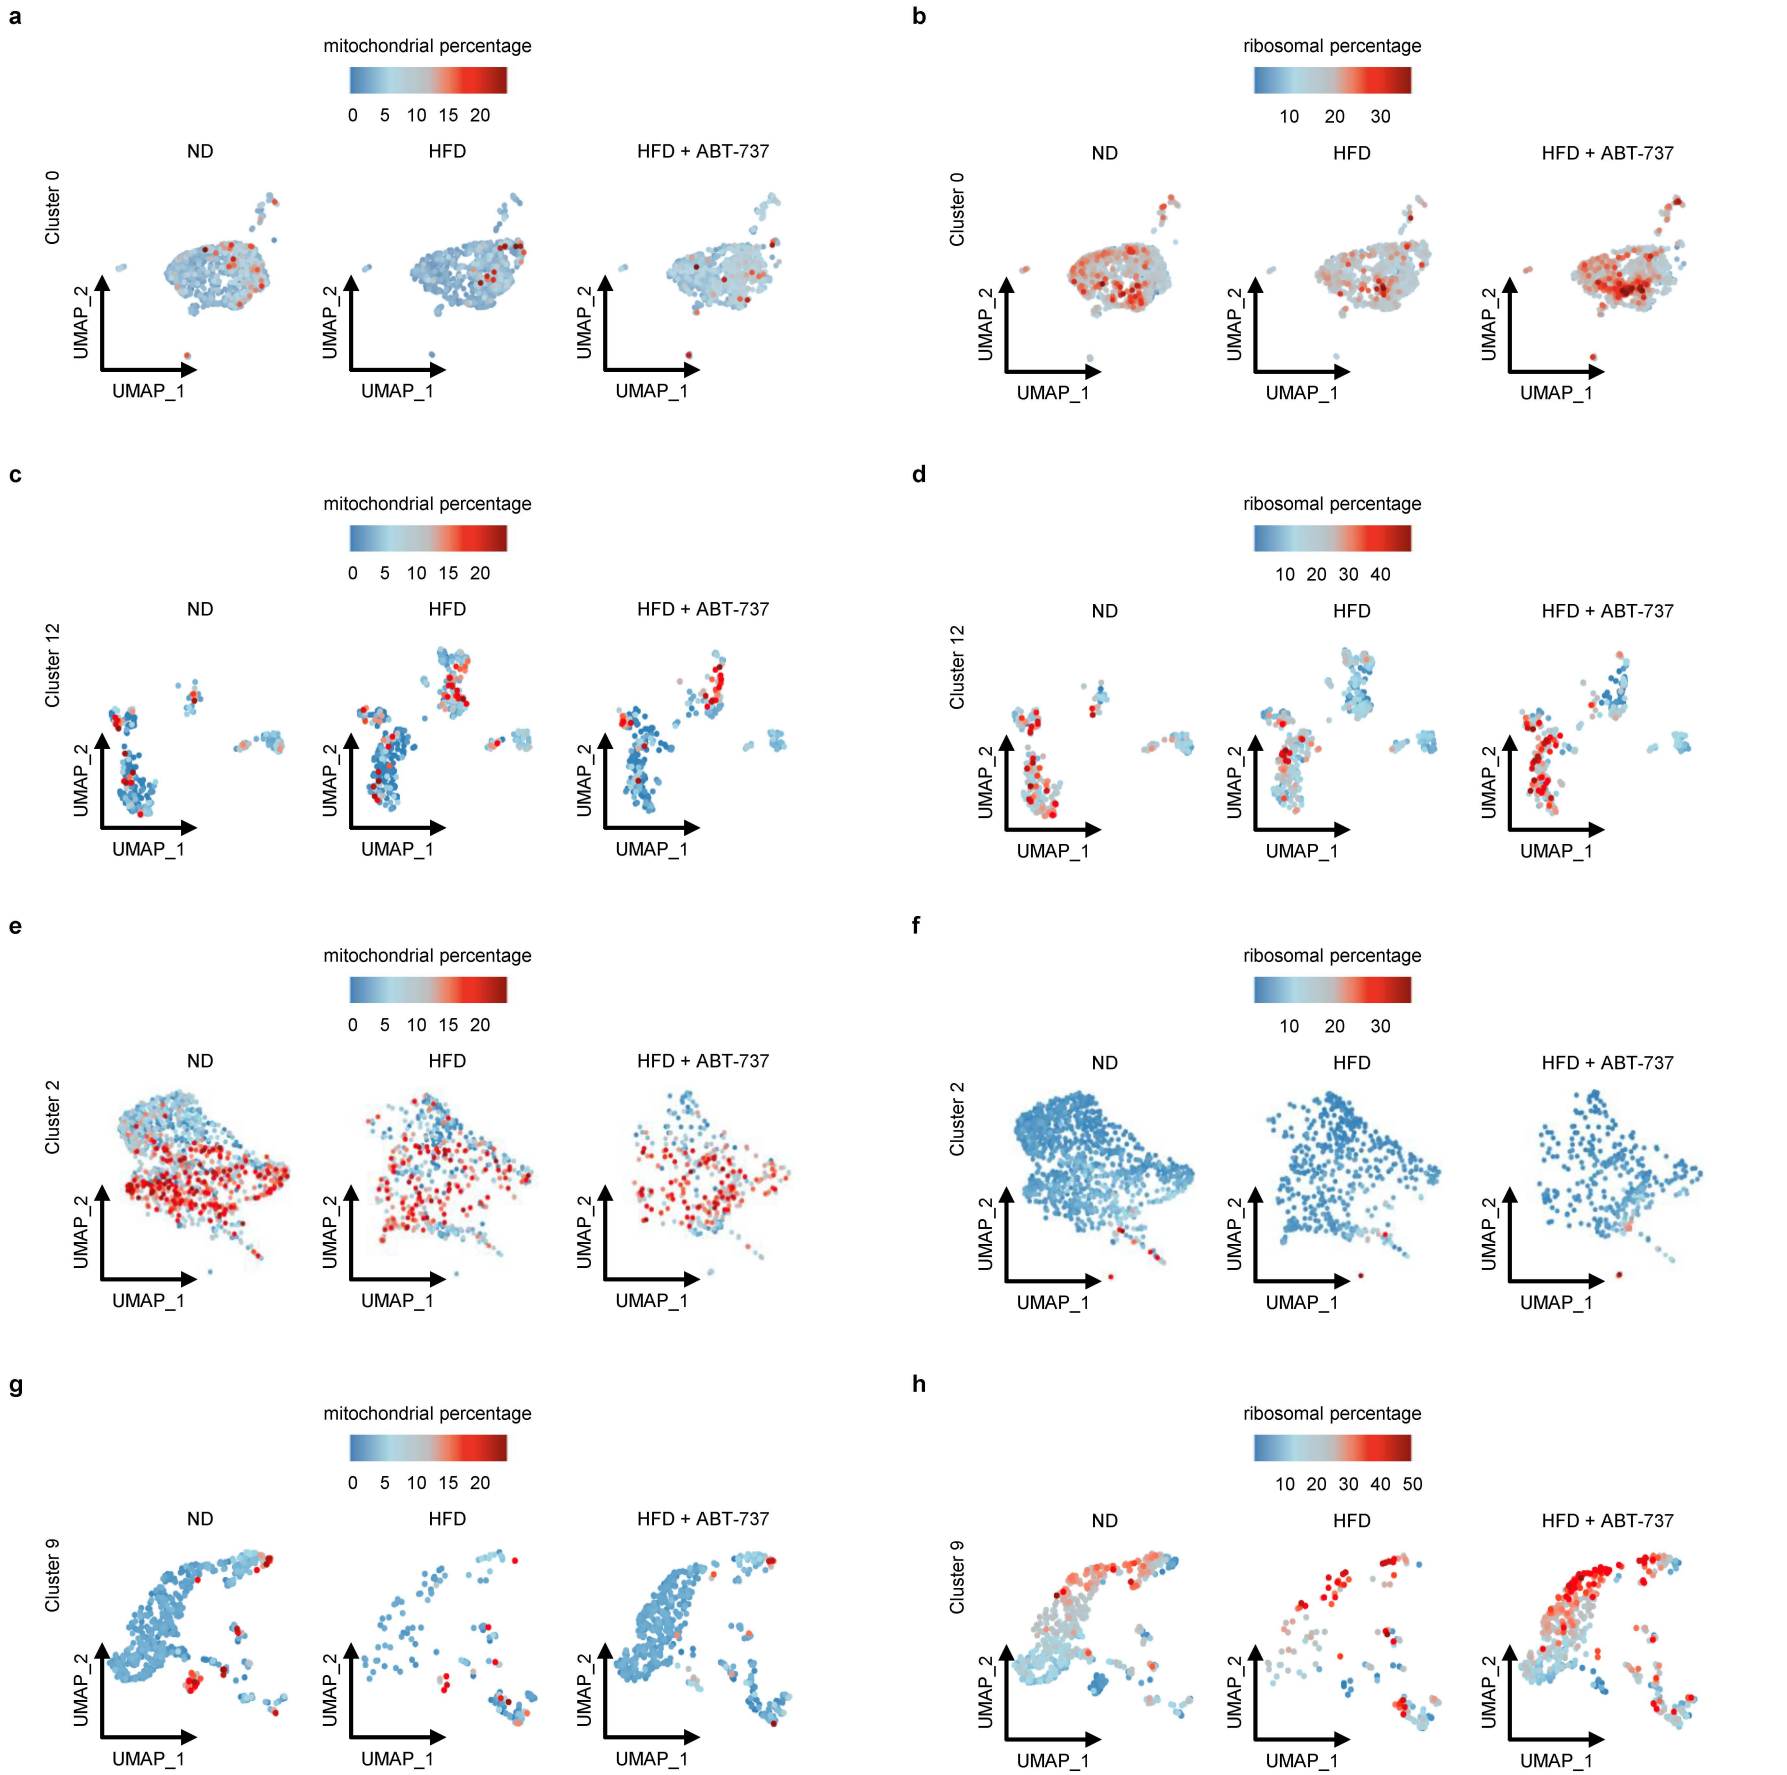

**Supplemental Fig. 4 | Analysis of mitochondrial and ribosomal gene expression in cell clusters with senescence features. a,** UMAPs of scRNA-seq mitochondrial gene expression across Cluster 0 subclustered VSMCs in ND, HFD, and HFD + ABT-737 treated mice. **b,** UMAPs of scRNA-seq ribosomal gene expression across Cluster 0 subclustered VSMCs in ND, HFD, and HFD + ABT-737 treated mice. **c,** UMAPs of scRNA-seq mitochondrial gene expression across Cluster 12 subclustered VSMCs in ND, HFD, and HFD + ABT-737 treated mice. **d,** UMAPs of scRNA-seq ribosomal gene expression across Cluster 12 subclustered VSMCs in ND, HFD, and HFD + ABT-737 treated mice. **e,** UMAPs of scRNA-seq mitochondrial gene expression across Cluster 2 subclustered fibroblasts in ND, HFD, and HFD + ABT-737 treated mice. **f,** UMAPs of scRNA-seq ribosomal gene expression across Cluster 2 subclustered fibroblasts in ND, HFD, and HFD + ABT-737 treated mice. **g,** UMAPs of scRNA-seq mitochondrial gene expression across Cluster 9 subclustered T-cells in ND, HFD, and HFD + ABT-737 treated mice. **h,** UMAPs of scRNA-seq ribosomal gene expression across Cluster 0 subclustered T-cells in ND, HFD, and HFD + ABT-737 treated mice.



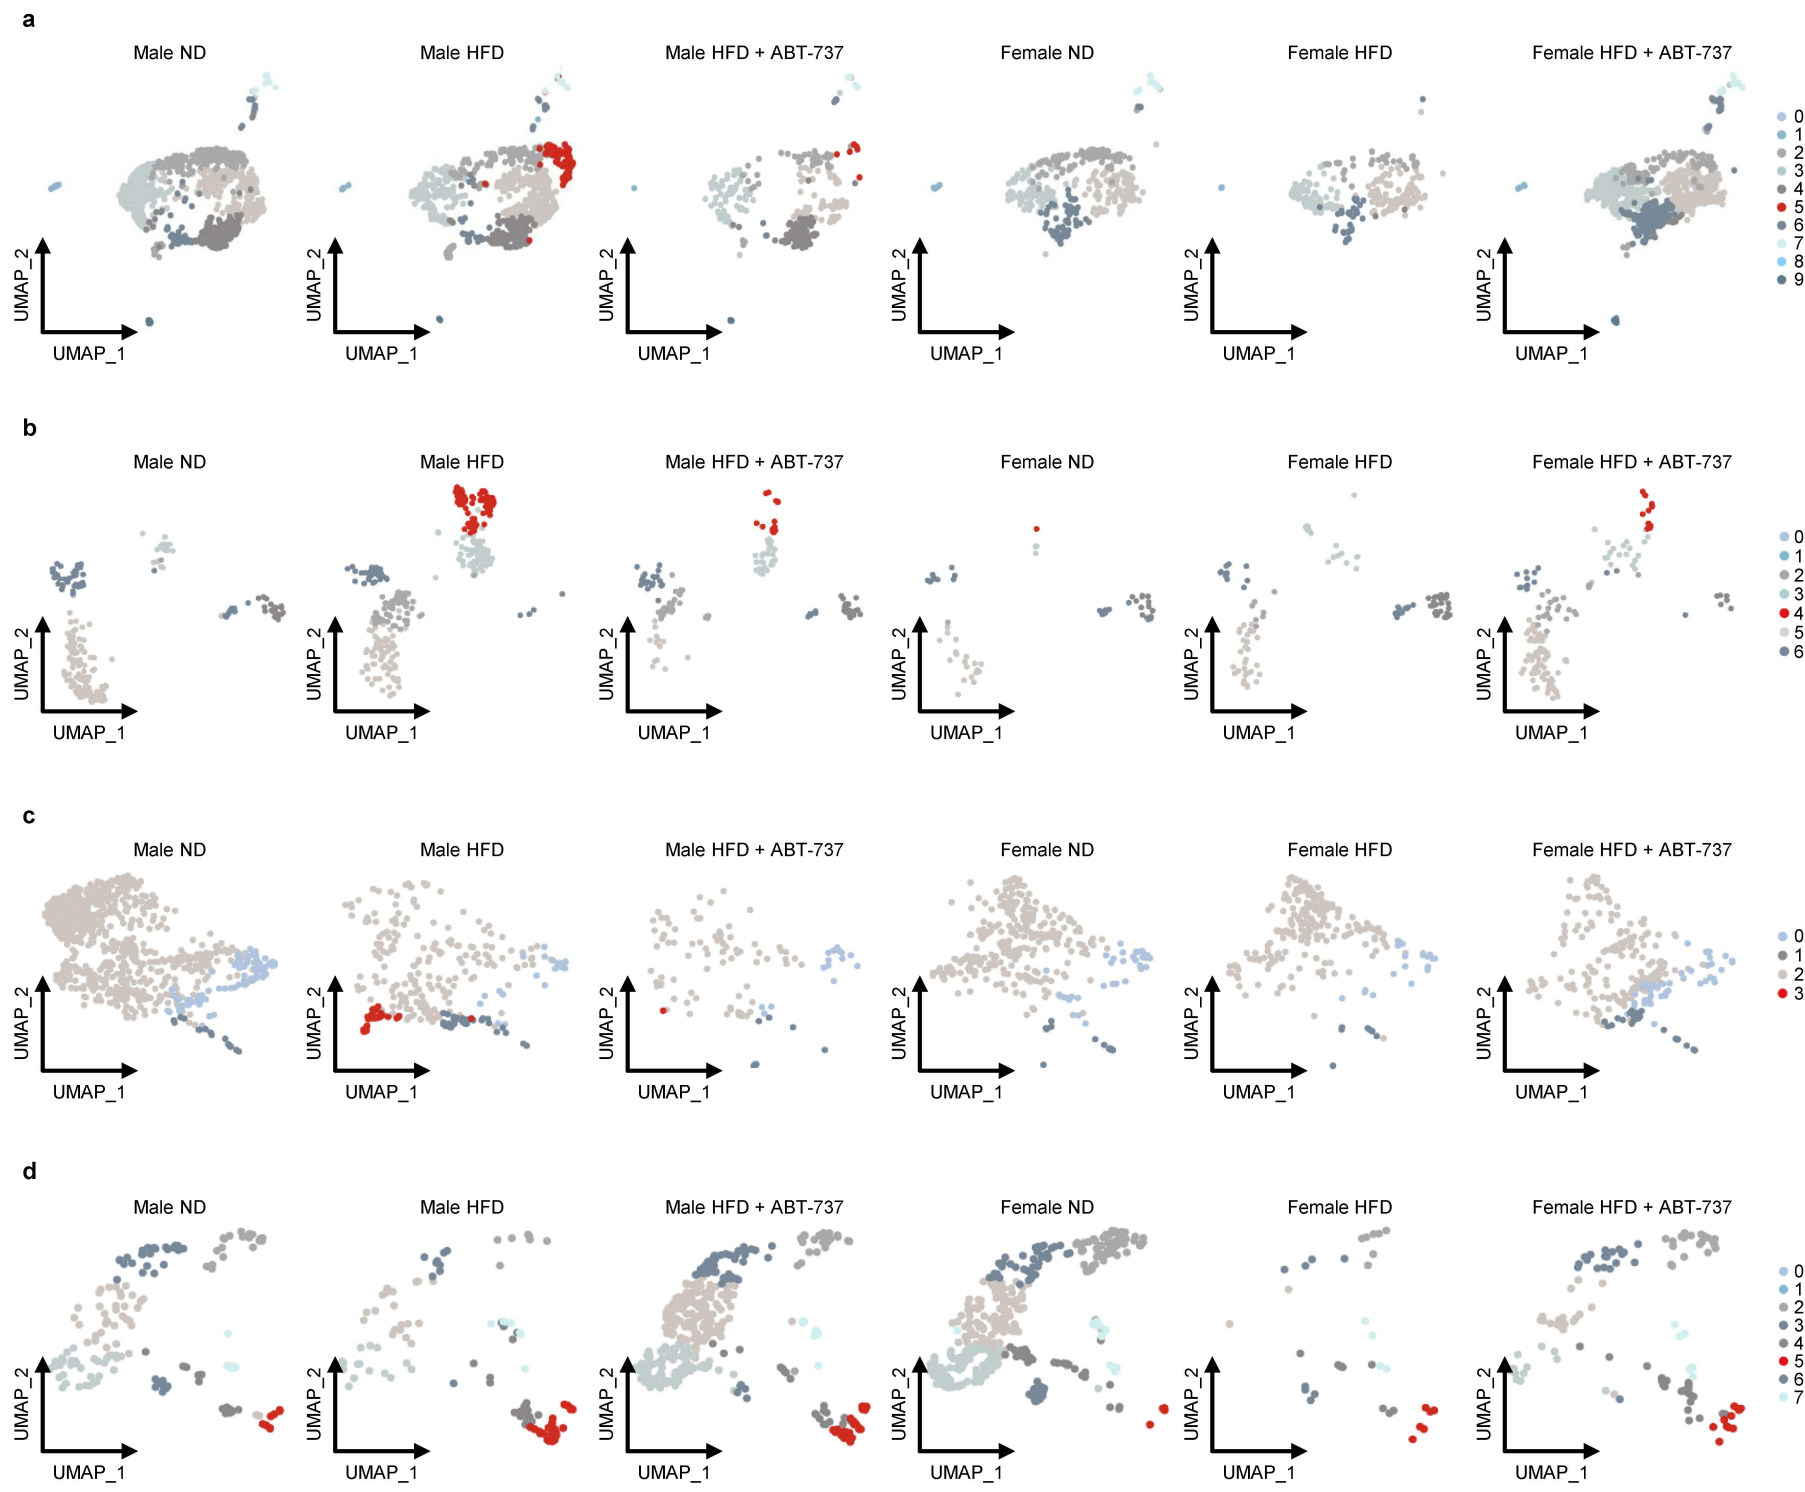

**Supplemental Fig. 5 | Sex differences in unbiased subclustering of senescent clusters.** **a**, UMAPs of Cluster 0 subclustering across the ND, HFD, and HFD + ABT-737 groups for male (*left*) and female (*right*) mice. **b**, UMAPs of Cluster 12 subclustering across ND, HFD, and HFD + ABT-737 for male (*left*) and female (*right*) mice. **c**, UMAPs of Cluster 2 subclustering across ND, HFD, and HFD + ABT-737 for male (*left*) and female (*right*) mice. **d**, UMAPs of Cluster 9 subclustering across the ND, HFD, and HFD + ABT-737 groups for male (*left*) and female (*right*) mice.

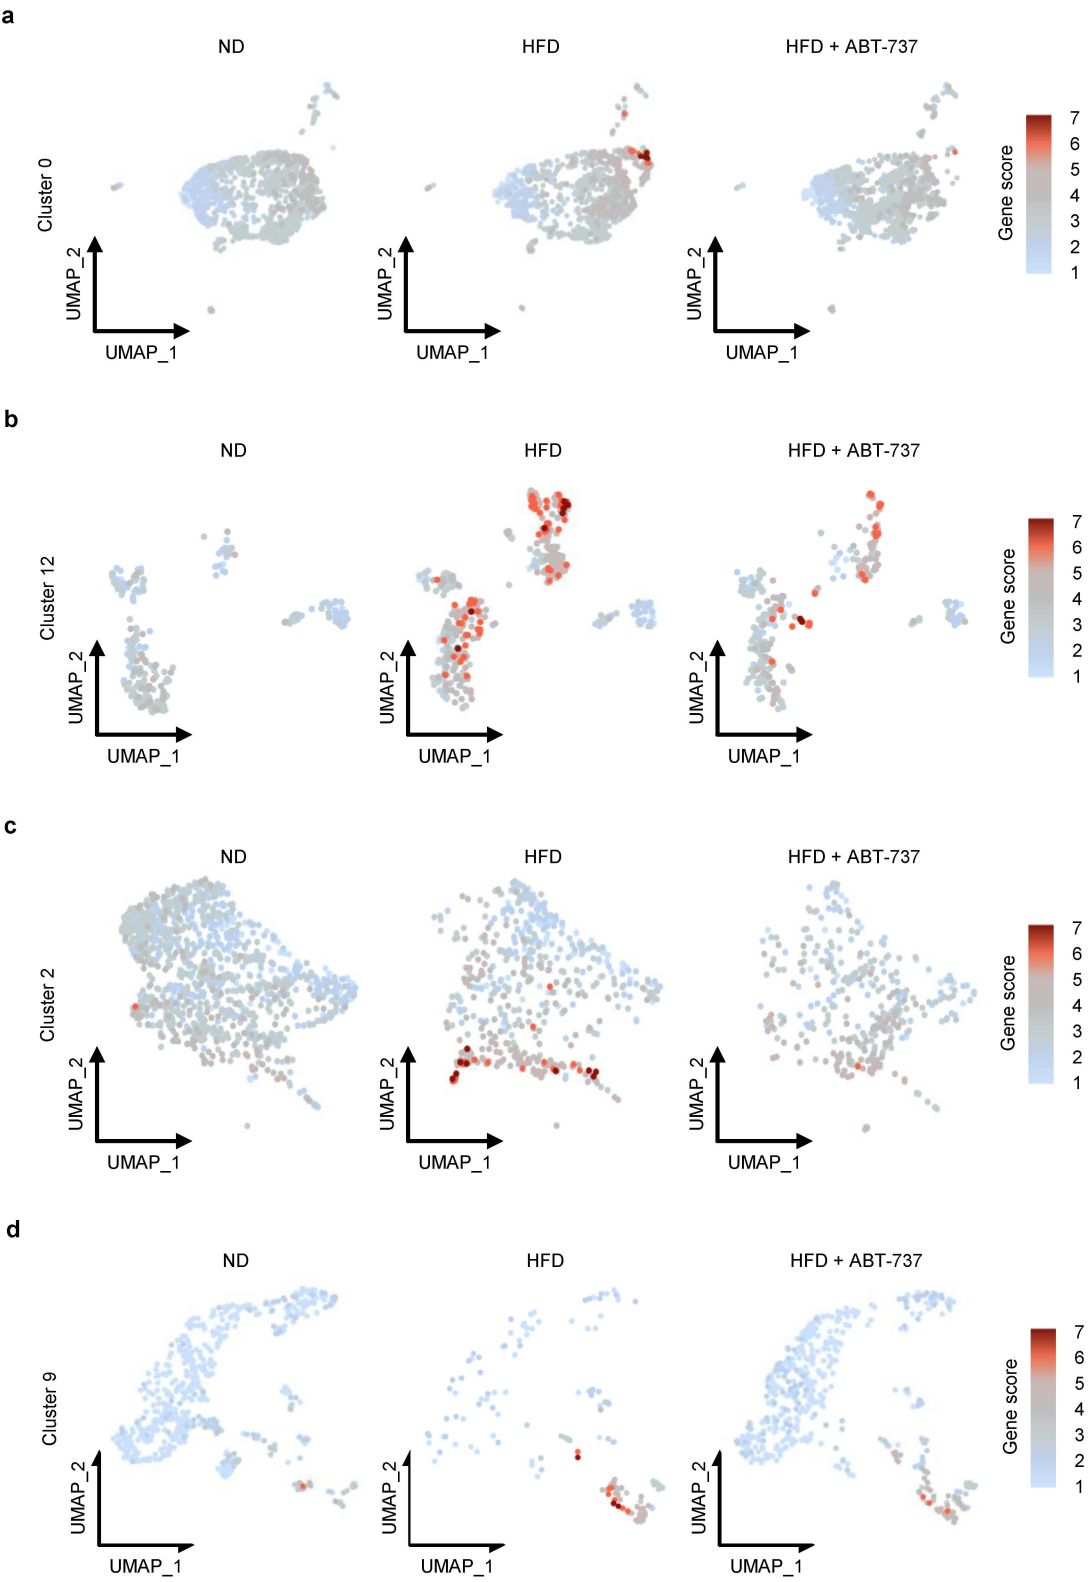

**Supplemental Fig. 6 | Vascular senescent score on individual cell clusters. a,** UMAPs of vascular-senescence scoring across Cluster 0 VSMCs in ND, HFD, and HFD + ABT-737. **b,** UMAPs of vascular-senescence scoring across Cluster 12 VSMCs in ND, HFD, and HFD + ABT-737. **c,** UMAPs of vascular-senescence scoring across Cluster 2 fibroblasts in ND, HFD, and HFD + ABT-737. **d,** UMAPs of vascular-senescence scoring across Cluster 9 T-cells in ND, HFD, and HFD + ABT-737.

**a**

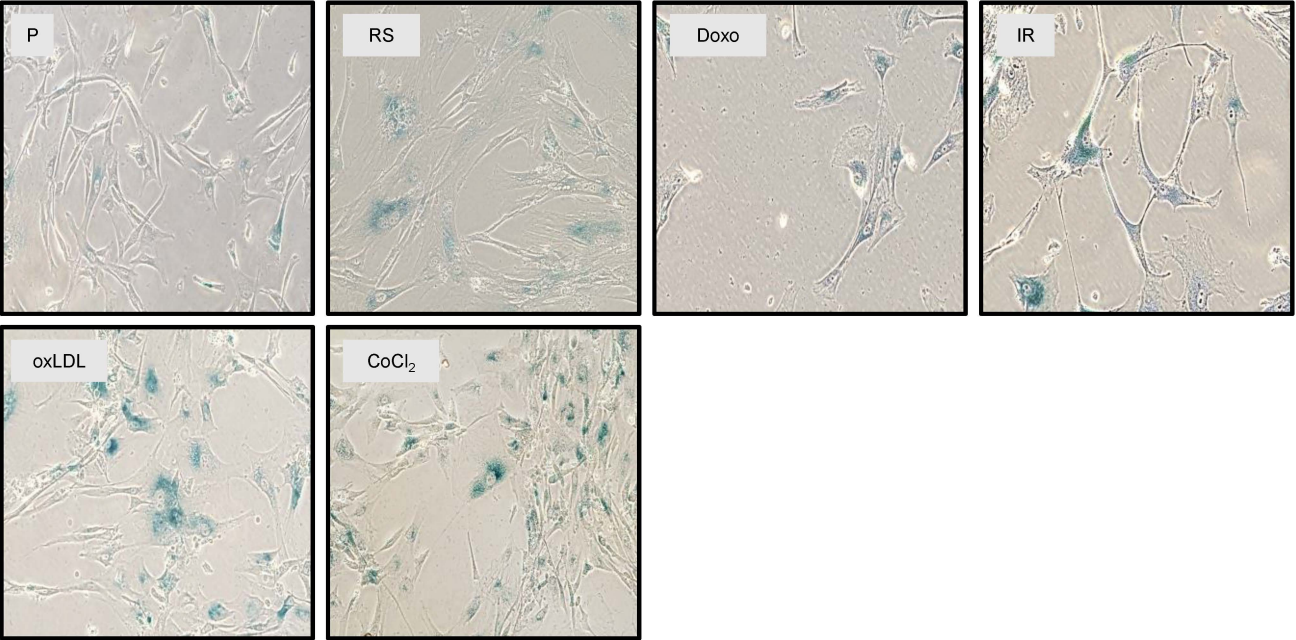

**b**

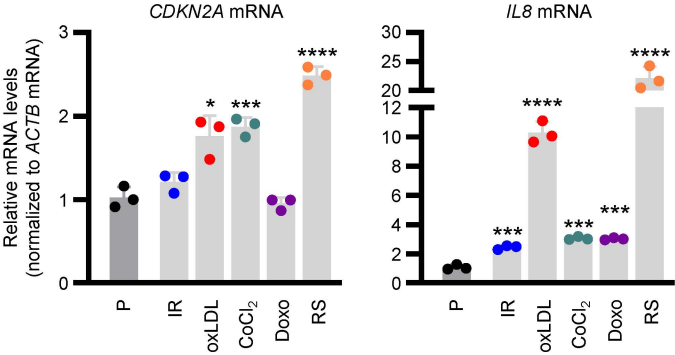

**c**

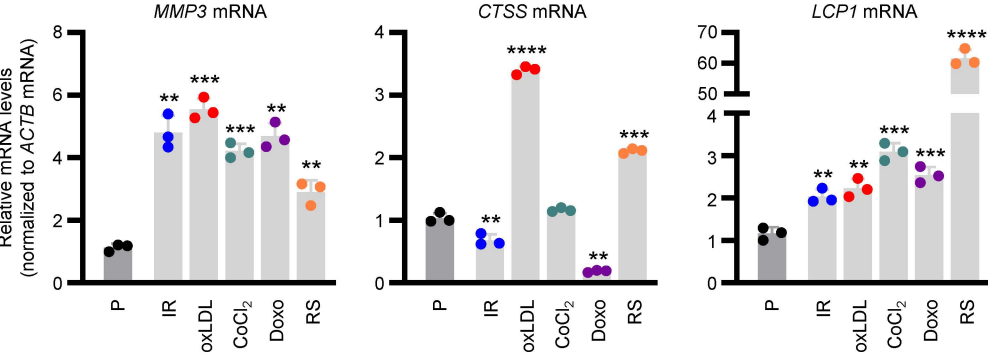

**d**

| Human metadata |              |                  |           |                 |
|----------------|--------------|------------------|-----------|-----------------|
| Transitional   | Fibromyocyte | Fibrochondrocyte | Foam-like | Fibroblast-like |
| TNFRSF11B      | LTBP2        | LUM              | APOE      | LUM             |
| SPAC           | MGP          | SERPINE2         | LUM       | CST3            |
| LTBP2          | TNFRSF11B    | LTBP2            | CD9       | LGALS3          |
| CD9            |              | CST3             | SPARC     |                 |
|                |              | MGP              |           |                 |

**Supplemental Fig. 7 | Human VSMC senescence validation.** **a**, Phase contrast micrographs of SA-βgal activity (blue) staining in proliferating (P), replicative senescence (RS), doxo-treated, IR-treated, oxLDL-treated, and CoCl<sub>2</sub>-treated human VSMCs for 7-10 days. **b**, RT-qPCR analysis of the levels of *CDKN2A* and *IL8* mRNAs in human VSMCs treated as described in (a). **c**, RT-qPCR analysis of the levels of *MMP3*, *CTSS*, and *LCP1* mRNAs in human VSMCs treated as described in (a). **d**, Table of human scRNA-seq metadata analysis from atherosclerotic tissue. Each column represents a VSMC phenotype identified in the metadata analysis, and each column includes the vascular senescent scoring genes that were expressed in the indicated VSMC phenotype. In b and c, data represent the means ±SD from n=3 biological replicates. Significance was established using Shapiro-Wilk test first, followed by Welch's t-test. \*, p≤0.05; \*\*, p≤0.01; \*\*\*, p≤0.001; \*\*\*\*, p≤0.0001.



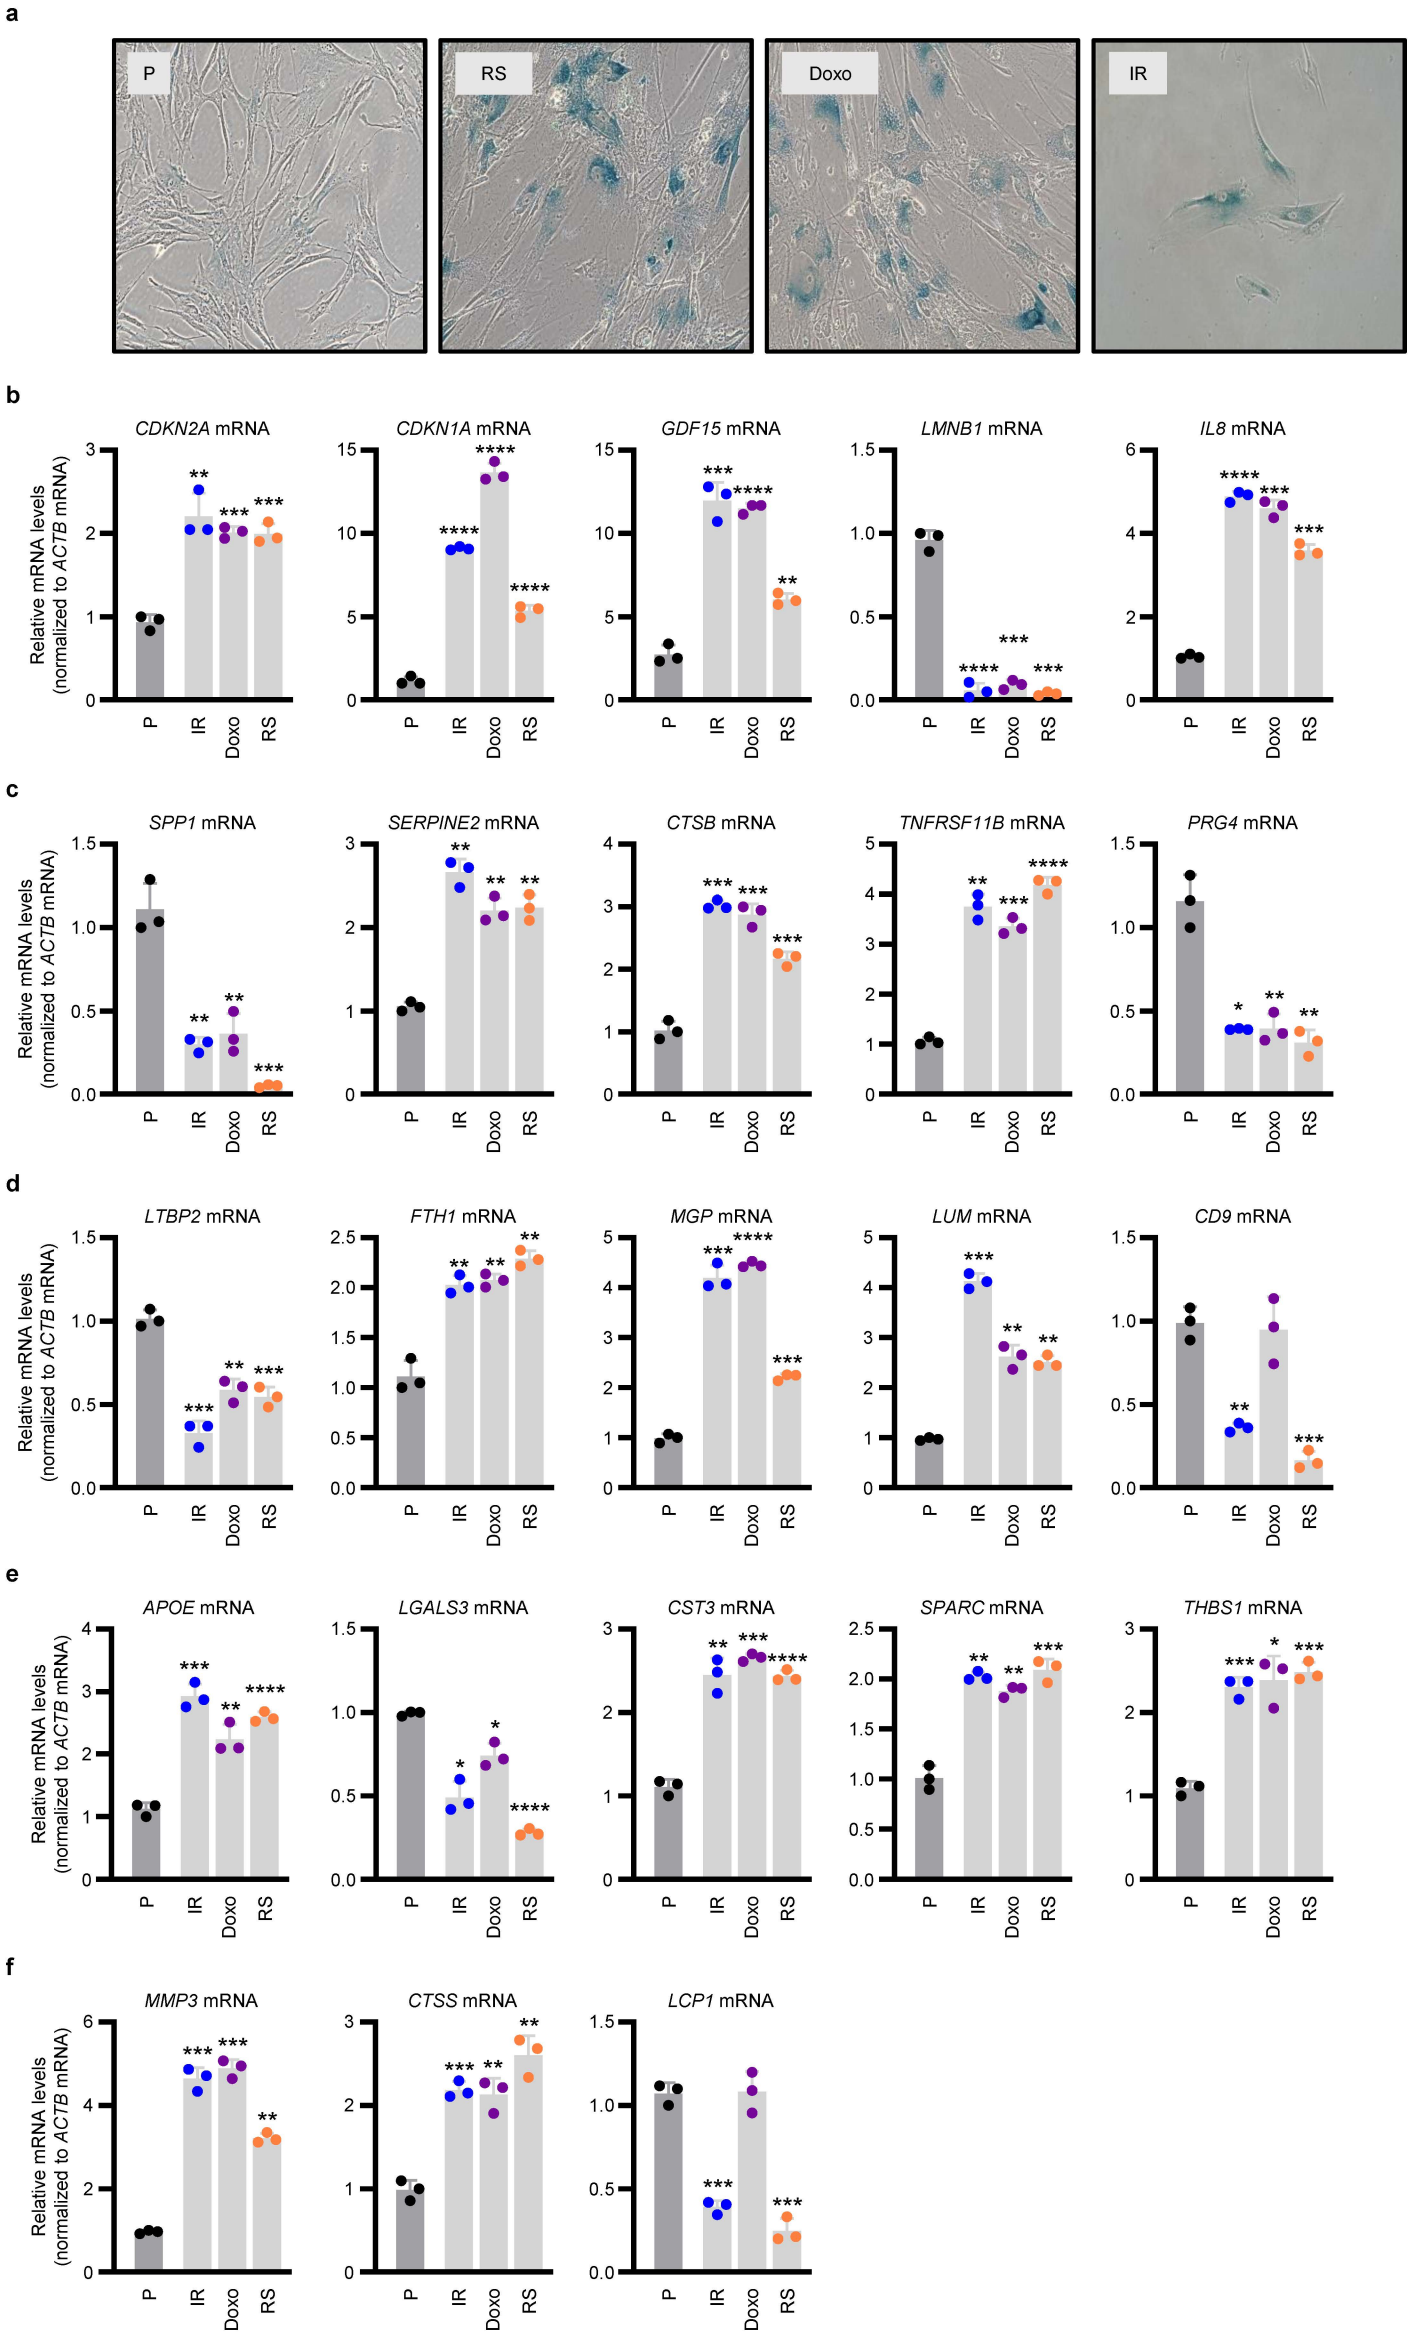

**Supplemental Fig. 8 | Human WI-38 fibroblast senescence validation.** **a**, Phase contrast micrographs of SA-βgal activity (blue) staining in human WI-38 fibroblasts that were either proliferating (P), rendered senescent by replicative senescence (RS), or by treatment with Doxo, IR and additional culture for 7-10 days. **b**, RT-qPCR analysis of the levels of *CDKN2A*, *CDKN1A*, *GDF15*, *LMNB1* and *IL8* mRNAs in WI-38 fibroblasts treated as described in (a). **c-f**, RT-qPCR analysis of the levels of *SPP1*, *SERPINE2*, *CTSB*, *TNFRSF11B*, *PRG4*, *LTPBP2*, *FTH1*, *MGP*, *LUM*, *CD9*, *APOE*, *LGALS3*, *CST3*, *SPARC*, *THBS1*, *MMP3*, *CTSS*, and *LCP1* mRNAs in human WI-38 fibroblasts treated as described in (a). In b-f, data represent the means ±SD from n=3 biological replicates. Significance was established using One-Way Anova with multiple comparisons. \*, p<0.05; \*\*, p<0.01; \*\*\*, p<0.001; \*\*\*\*, p<0.0001.

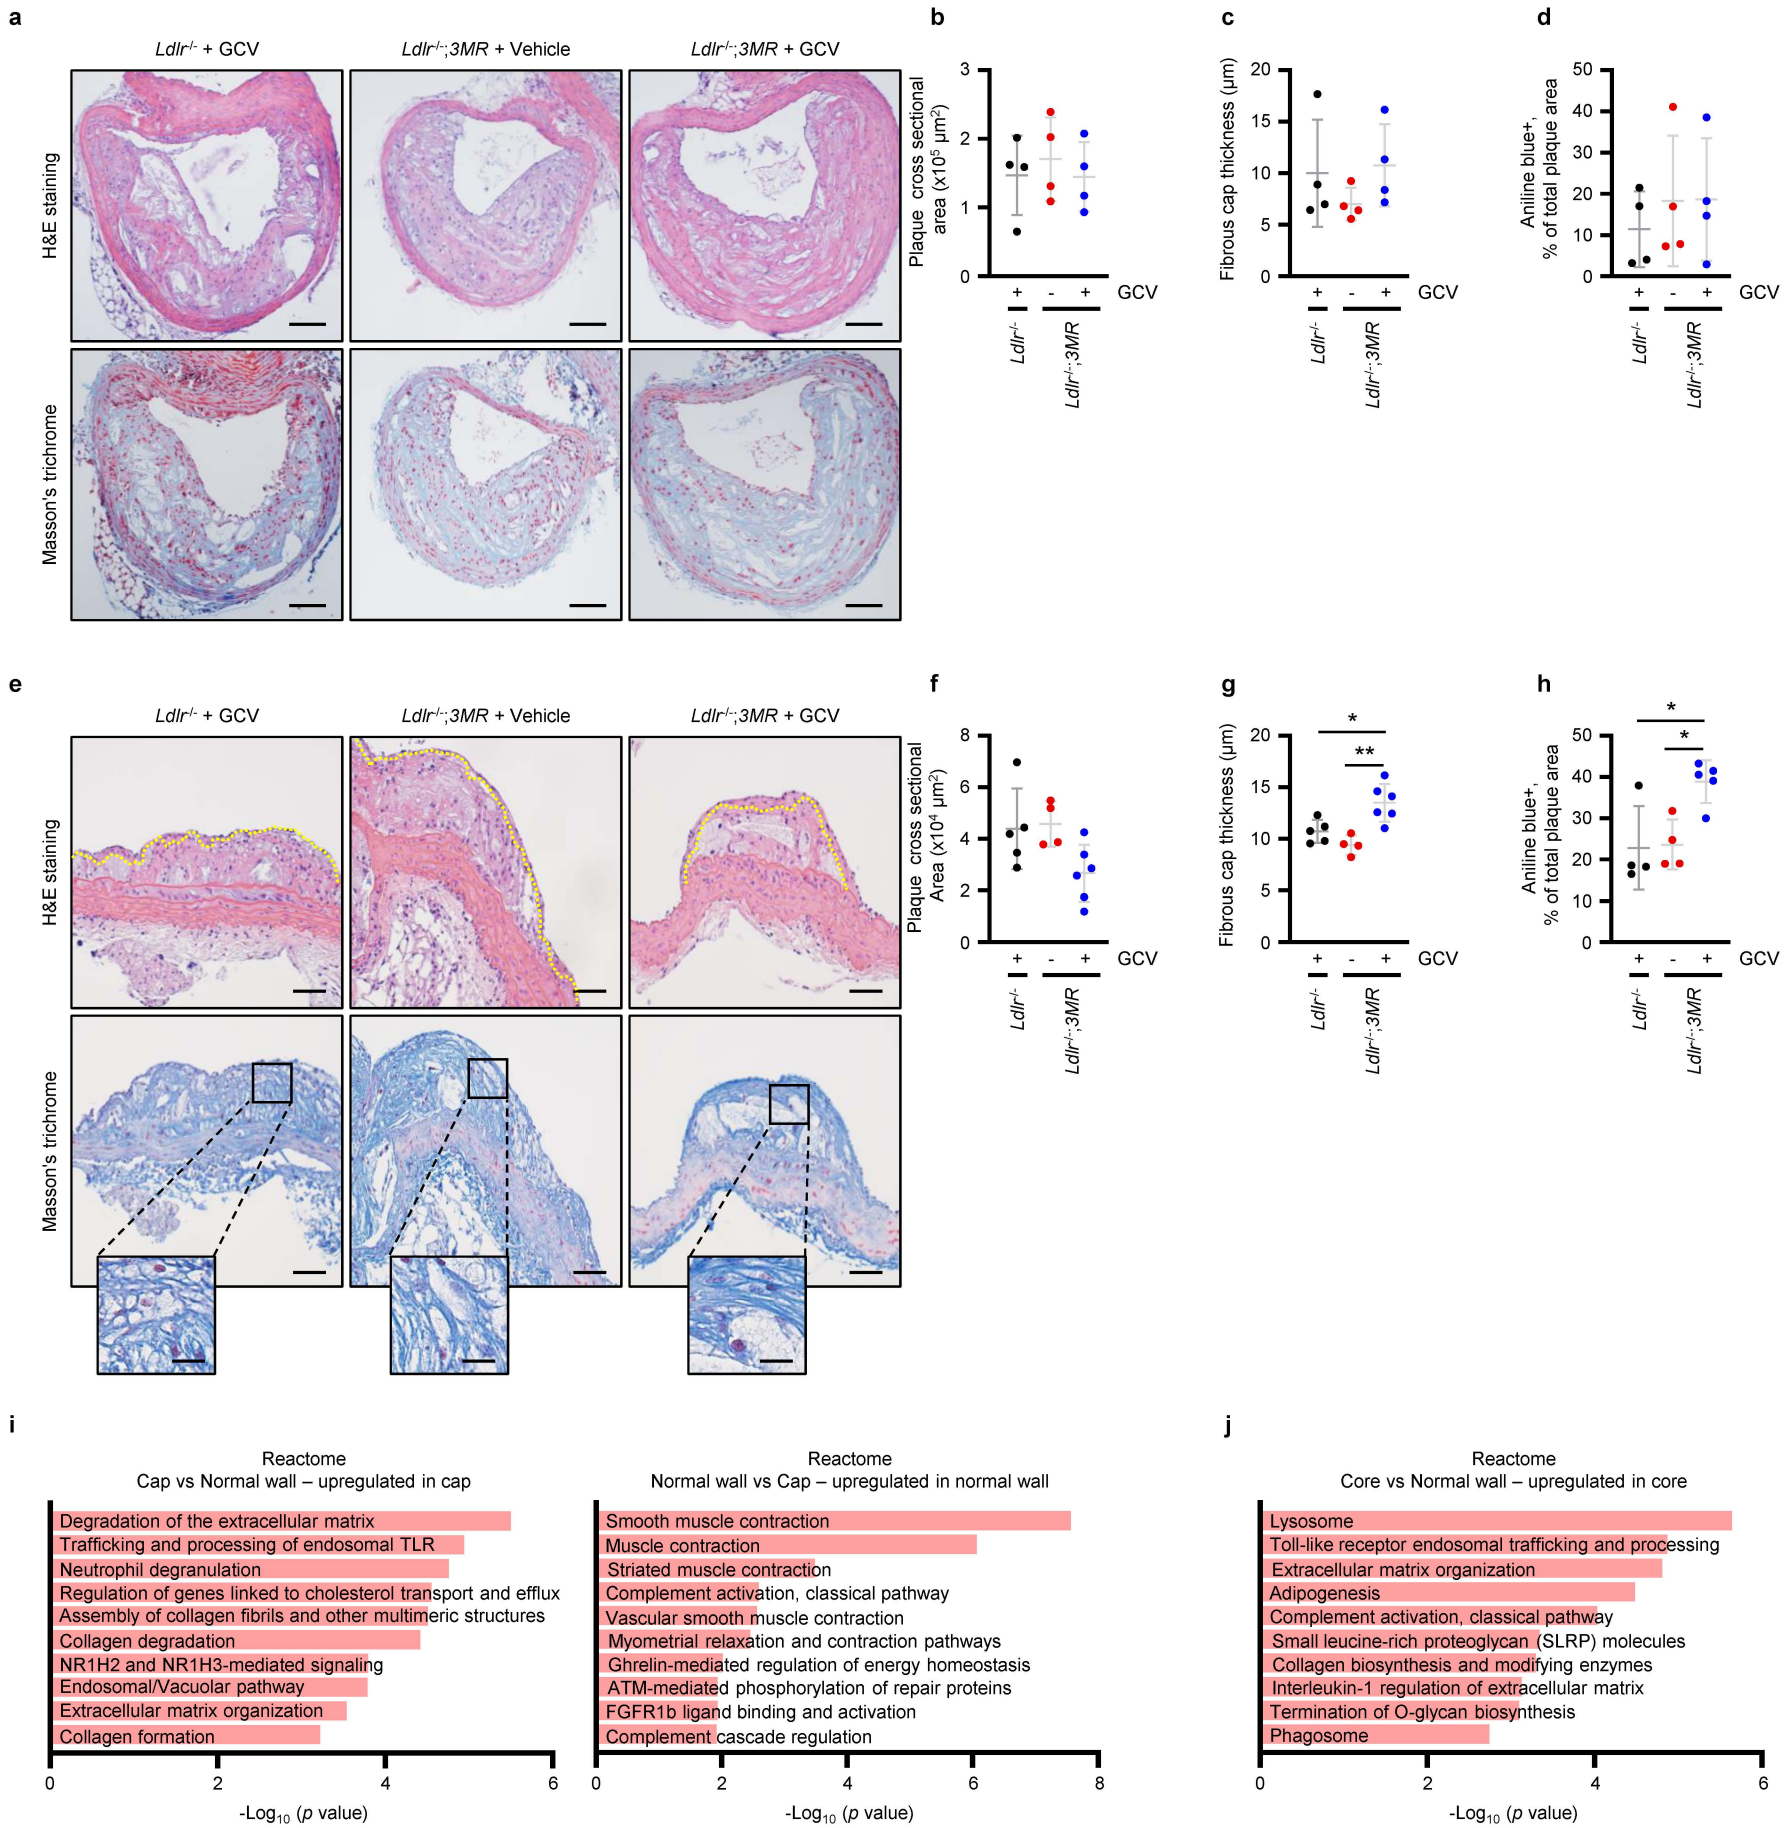

**Supplemental Fig. 9 | Analysis for spatial transcriptomic profiling of arterial segments.** **a**, H&E staining (*top*) and Masson's trichrome staining (*bottom*) of brachiocephalic arterial sections from *Ldlr*<sup>-/-</sup> + GCV, *Ldlr*<sup>-/-</sup>;3MR + Vehicle, and *Ldlr*<sup>-/-</sup>;3MR + GCV treated mice. The scale bar is 100 μm. **b**, Plaque cross sectional area, **c**, plaque fibrous cap thickness measurements and **d**, Masson's trichrome analysis of Aniline blue-positive area over total plaque area in brachiocephalic arterial sections from *Ldlr*<sup>-/-</sup> + GCV, *Ldlr*<sup>-/-</sup>;3MR + Vehicle, and *Ldlr*<sup>-/-</sup>;3MR + GCV treated mice. **e**, H&E staining (*top*) and Masson's trichrome staining (*bottom*) of the descending aortic sections from *Ldlr*<sup>-/-</sup> + GCV, *Ldlr*<sup>-/-</sup>;3MR + Vehicle, and *Ldlr*<sup>-/-</sup>;3MR + GCV treated mice. The scale bar is 50 μm. **f**, Plaque cross sectional area, **g**, plaque fibrous cap thickness measurements (cap is underlined with yellow dashed line), and **h**, Masson's trichrome analysis of Aniline blue-positive area over total plaque area in sections of the descending aorta from *Ldlr*<sup>-/-</sup> + GCV, *Ldlr*<sup>-/-</sup>;3MR + Vehicle, and *Ldlr*<sup>-/-</sup>;3MR + GCV treated mice. Inset image scale bar is 5 μm. **i**, Reactome pathway analysis of genes upregulated in cap compared to normal wall across all conditions (*left*) and of genes upregulated in the normal wall compared to the cap (*right*). **j**, Reactome pathway analysis of genes upregulated in the core compared to the normal wall across all conditions. Significance was established using One-Way Anova with multiple comparisons. \*, p≤0.05; \*\*, p≤0.01; \*\*\*, p≤0.001; \*\*\*\*, p≤0.0001.
