# Supplementary material for: Single-cell and spatial transcriptomics uncovers the role of senescent vascular cells in pathological arterial remodeling during murine atherosclerosis
Source: Research Square preprint supplement (doi:10.21203/rs.3.rs-4282827/v1), 2024-10-29
Supplement: Supplementary file 2 [file 0ab138731515ecbd7edf8bb4.xlsx]

## Sheet: Sheet1
ACTB_F	GCACAGAGCCTCGCCTT
ACTB_R	GTTGTCGACGACGAGCG
CDKN1A_F	AGTCAGTTCCTTGTGGAGCC
CDKN1A_R	CATGGGTTCTGACGGACAT
GDF15_F	GACCCTCAGAGTTGCACTCC
GDF15_R	GCCTGGTTAGCAGGTCCTC
LMNB1_F	GAAAAAGACAACTCTCGTCGCA
LMNB1_R	GTAAGCACTGATTTCCATGTCCA
CDKN2A_F	GTTACGGTCGGAGGCCG
CDKN2A_R	GTGAGAGTGGCGGGGTC
IL8_F	TCCTGATTTCTGCAGCTCTGT
IL8_R	AAATTTGGGGTGGAAAGGTT
SPP1_F	CAGTGATTTGCTTTTGCCTCC
SPP1_R	ATTCTGCTTCTGAGATGGGTC
SERPINE2_F	ATCCAGCCTCTGCCTGTGATTC
SERPINE2_R	TTGACGAGGACCAGTCTGGTGA
CTSB_F	CTTGAAGAGGCTATGTGGTACC
CTSB_R	CCCTGGTCTCTGATCTCTTTG
TNFRSF11B_F	TCCTGGATTTGGAGTGGTGC
TNFRSF11B_R	TACGAAGCTGCTCGAAGGTG
PRG4_F	TGCCACCTGCAACTGTGATT
PRG4_R	TCACACTCCCTCCCTCTCTC
LTBP2_F	TGTGTGTCGGACAAGGCAAT
LTBP2_R	ATCTGTCAATGCCTGGGGTG
FTH1_F	TCAACAGTGCTTGGACGGAA
FTH1_R	GCTCTGGTGGTAGTTCTGGC
MGP_F	ACTGCTGCTACACAAGACCC
MGP_R	ATGTGATTCCTGGGCACGAAT
LUM_F	CTGCCCTGAAAGCTACCCAA
LUM_R	CGATTGCCATCCAAACGCAA
CD9_F	GGCTTCCTCTTGGTGATATTCG
CD9_R	GGCTCATCCTTGGTTTTCAG
APOE_F	GCTCAGGGGCCTCTAGAAAGA
APOE_R	CTCGAACCAGCTCTTGAGGC
LGALS3_F	AGCCAACGAGCGGAAAATGG
LGALS3_R	TGTTATCAGCATGCGAGGCA
CST3_F	GCGAGTACAACAAAGCCAGC
CST3_R	CACAGAGCCTGTGGGGTAAA
SPARC_F	CTGTGGCAGAGGTGACTGAG
SPARC_R	TGGGAGAGGTACCCGTCAAT
THBS1_F	CAGGAGCAACCTCTACTCCG
THBS1_R	CAGCAGGGATCCTGTGTGTA
MMP3_F	AGAAGTGAGCAACTGCAAAAACT
MMP3_R	CTTCCCCGTCACCTCCAATC
CTSS_F	TTTGTGTGCTCTTGGTGTGC
CTSS_R	GGGAACTCTCAGGGAACTCATC
LCP1_F	GCACCCAACACTCCTATTCAG
LCP1_R	GCCATCTCCAACAGCATTAAAG
