# Supplementary material for: Single-cell and spatial transcriptomics uncovers the role of senescent vascular cells in pathological arterial remodeling during murine atherosclerosis
Source: Research Square preprint supplement (doi:10.21203/rs.3.rs-4282827/v1), 2024-10-29
Supplement: Supplementary file 3 [file 8a984670e7a7d93dd905b3a6.xlsx]

## Sheet: Sheet1
CTSB_tailedProbes	SPP1_tailedProbes	FTH1_tailedProbes	Reporter probe
TTTGTGAGACCATCGAAGAGgaaggatcaaggaccaccacatTTTGTGAGACCATCGAAGAG	TTTGTGAGACCATCGAAGAGatgtggctataggatctgggtgTTTGTGAGACCATCGAAGAG	TTTGTGAGACCATCGAAGAGgatcctgcgtcaggcgagcgTTTGTGAGACCATCGAAGAG	CTCTTCGATGGTCTCACAAA-Texas Red
TTTGTGAGACCATCGAAGAGtggtcagtgccagcaggcaagaTTTGTGAGACCATCGAAGAG	TTTGTGAGACCATCGAAGAGttctgcttctgagatgggtcagTTTGTGAGACCATCGAAGAG	TTTGTGAGACCATCGAAGAGacagcgggccgcacttatagTTTGTGAGACCATCGAAGAG
TTTGTGAGACCATCGAAGAGgtggaaggaaggcttgtcatggTTTGTGAGACCATCGAAGAG	TTTGTGAGACCATCGAAGAGacagcattctgtggcgcaaggaTTTGTGAGACCATCGAAGAG	TTTGTGAGACCATCGAAGAGgagaacgtctggcgcaggagTTTGTGAGACCATCGAAGAG
TTTGTGAGACCATCGAAGAGagttaatcaggtcatccgacagTTTGTGAGACCATCGAAGAG	TTTGTGAGACCATCGAAGAGattgcttggaagagtttcttgcTTTGTGAGACCATCGAAGAG	TTTGTGAGACCATCGAAGAGaggaaaccgcggcgactctgTTTGTGAGACCATCGAAGAG
TTTGTGAGACCATCGAAGAGtgtagaagttgcgtccagcctgTTTGTGAGACCATCGAAGAG	TTTGTGAGACCATCGAAGAGcatgtggtcatggctttcattgTTTGTGAGACCATCGAAGAG	TTTGTGAGACCATCGAAGAGtccgttcaagcactgttgaaTTTGTGAGACCATCGAAGAG
TTTGTGAGACCATCGAAGAGcaacccttcctggcagtttgggTTTGTGAGACCATCGAAGAG	TTTGTGAGACCATCGAAGAGtcctcgctctctgcatggtctcTTTGTGAGACCATCGAAGAG	TTTGTGAGACCATCGAAGAGggaacgacgaagttgcaaagTTTGTGAGACCATCGAAGAG
TTTGTGAGACCATCGAAGAGgtagatctatgtcctcaccgaaTTTGTGAGACCATCGAAGAG	TTTGTGAGACCATCGAAGAGtcagattcatccgagtccacagTTTGTGAGACCATCGAAGAG	TTTGTGAGACCATCGAAGAGcttgcgagggagacgcggtgTTTGTGAGACCATCGAAGAG
TTTGTGAGACCATCGAAGAGgttcccgtgcatcaaaggtttcTTTGTGAGACCATCGAAGAG	TTTGTGAGACCATCGAAGAGgactcatccgaatggtgagattTTTGTGAGACCATCGAAGAG	TTTGTGAGACCATCGAAGAGtcctggtggtagttctggcgTTTGTGAGACCATCGAAGAG
TTTGTGAGACCATCGAAGAGcaatggtcgggcagttggaccaTTTGTGAGACCATCGAAGAG	TTTGTGAGACCATCGAAGAGgtactagcagtgacggtctcatTTTGTGAGACCATCGAAGAG	TTTGTGAGACCATCGAAGAGgcggttgatggcagcctccgTTTGTGAGACCATCGAAGAG
TTTGTGAGACCATCGAAGAGaggagccctggtctctaatctgTTTGTGAGACCATCGAAGAG	TTTGTGAGACCATCGAAGAGattggagtgaaagtgtctgcttTTTGTGAGACCATCGAAGAG	TTTGTGAGACCATCGAAGAGcatacaactccaggttgatcTTTGTGAGACCATCGAAGAG
TTTGTGAGACCATCGAAGAGccccaaatgcccaacaagagccTTTGTGAGACCATCGAAGAG	TTTGTGAGACCATCGAAGAGttggggacatcgactgtagggaTTTGTGAGACCATCGAAGAG	TTTGTGAGACCATCGAAGAGatagacagatagacgtaggaTTTGTGAGACCATCGAAGAG
TTTGTGAGACCATCGAAGAGttcggtcagaaatggcttccacTTTGTGAGACCATCGAAGAG	TTTGTGAGACCATCGAAGAGataagccaagctatcacctcggTTTGTGAGACCATCGAAGAG	TTTGTGAGACCATCGAAGAGatctcggtcaaaataacaagTTTGTGAGACCATCGAAGAG
TTTGTGAGACCATCGAAGAGctcggccattggtgtgaatgcaTTTGTGAGACCATCGAAGAG	TTTGTGAGACCATCGAAGAGactcctagactttgacctcagtTTTGTGAGACCATCGAAGAG	TTTGTGAGACCATCGAAGAGcaaagttcttcagagccacaTTTGTGAGACCATCGAAGAG
TTTGTGAGACCATCGAAGAGcttcagcagacacctccacgttTTTGTGAGACCATCGAAGAG	TTTGTGAGACCATCGAAGAGatactgttcatcagaaacctggTTTGTGAGACCATCGAAGAG	TTTGTGAGACCATCGAAGAGgattggtggagaaagtatttTTTGTGAGACCATCGAAGAG
TTTGTGAGACCATCGAAGAGggataccacagcaagtaagcagTTTGTGAGACCATCGAAGAG	TTTGTGAGACCATCGAAGAGgaggtcctcatctgtggcatcaTTTGTGAGACCATCGAAGAG	TTTGTGAGACCATCGAAGAGggcatgctccctctcctcatTTTGTGAGACCATCGAAGAG
TTTGTGAGACCATCGAAGAGcaccattacagccgtccccacaTTTGTGAGACCATCGAAGAG	TTTGTGAGACCATCGAAGAGctcaccgctcttcatgtgagagTTTGTGAGACCATCGAAGAG	TTTGTGAGACCATCGAAGAGtctgcagcttcatcagtttcTTTGTGAGACCATCGAAGAG
TTTGTGAGACCATCGAAGAGaagctccatgctccagagggatTTTGTGAGACCATCGAAGAG	TTTGTGAGACCATCGAAGAGgatgacatcgagggactccttaTTTGTGAGACCATCGAAGAG	TTTGTGAGACCATCGAAGAGaagattcggccacctcgctgTTTGTGAGACCATCGAAGAG
TTTGTGAGACCATCGAAGAGagggatggtgtatggtaagcagTTTGTGAGACCATCGAAGAG	TTTGTGAGACCATCGAAGAGcatgctcagaagctgggcaacaTTTGTGAGACCATCGAAGAG	TTTGTGAGACCATCGAAGAGtggtttctttatatcctgcaTTTGTGAGACCATCGAAGAG
TTTGTGAGACCATCGAAGAGgccattgacatggtgctcgcagTTTGTGAGACCATCGAAGAG	TTTGTGAGACCATCGAAGAGtccgttgttgtcctgatcagagTTTGTGAGACCATCGAAGAG	TTTGTGAGACCATCGAAGAGcgctctcccagtcatcacggTTTGTGAGACCATCGAAGAG
TTTGTGAGACCATCGAAGAGcttgttgcacctgggagtatctTTTGTGAGACCATCGAAGAG	TTTGTGAGACCATCGAAGAGctgacttgactcatggctgcccTTTGTGAGACCATCGAAGAG	TTTGTGAGACCATCGAAGAGgcacactccattgcattcagTTTGTGAGACCATCGAAGAG
TTTGTGAGACCATCGAAGAGagacacgctgtaggaagtgtacTTTGTGAGACCATCGAAGAG	TTTGTGAGACCATCGAAGAGtgtttccagacttggttcatccTTTGTGAGACCATCGAAGAG	TTTGTGAGACCATCGAAGAGtcacactcttttccaagtgcTTTGTGAGACCATCGAAGAG
TTTGTGAGACCATCGAAGAGtgccatgatctccttcacactgTTTGTGAGACCATCGAAGAG	TTTGTGAGACCATCGAAGAGctctttggaatgctcaagtctgTTTGTGAGACCATCGAAGAG	TTTGTGAGACCATCGAAGAGtgcagttccagtagtgactgTTTGTGAGACCATCGAAGAG
TTTGTGAGACCATCGAAGAGgtcagaaaacacagtgaaggcaTTTGTGAGACCATCGAAGAG	TTTGTGAGACCATCGAAGAGacttgcttgactatcgatcacaTTTGTGAGACCATCGAAGAG	TTTGTGAGACCATCGAAGAGattcttgtcagtagccagttTTTGTGAGACCATCGAAGAG
TTTGTGAGACCATCGAAGAGcatatcaccggcttcatgcttgTTTGTGAGACCATCGAAGAG	TTTGTGAGACCATCGAAGAGctgatgttccaggctggctttgTTTGTGAGACCATCGAAGAG	TTTGTGAGACCATCGAAGAGtgaagtcacataagtggggaTTTGTGAGACCATCGAAGAG
TTTGTGAGACCATCGAAGAGaactccattctctactccccagTTTGTGAGACCATCGAAGAG	TTTGTGAGACCATCGAAGAGcttgtggctgtgaaacttgtggTTTGTGAGACCATCGAAGAG	TTTGTGAGACCATCGAAGAGtcactcagataatacgtctcTTTGTGAGACCATCGAAGAG
TTTGTGAGACCATCGAAGAGaagagttggctgccagccagtaTTTGTGAGACCATCGAAGAG	TTTGTGAGACCATCGAAGAGcttagggtctaggactagcttgTTTGTGAGACCATCGAAGAG	TTTGTGAGACCATCGAAGAGgttctttaatggatttcaccTTTGTGAGACCATCGAAGAG
TTTGTGAGACCATCGAAGAGcattatcaccccagtcaaggttTTTGTGAGACCATCGAAGAG	TTTGTGAGACCATCGAAGAGtagttgacctcagaagatgaacTTTGTGAGACCATCGAAGAG	TTTGTGAGACCATCGAAGAGtaagttggtcacgtggtcacTTTGTGAGACCATCGAAGAG
TTTGTGAGACCATCGAAGAGctgattcaatgccacagtggttTTTGTGAGACCATCGAAGAG		TTTGTGAGACCATCGAAGAGcttcaggggcacccatcttgTTTGTGAGACCATCGAAGAG
TTTGTGAGACCATCGAAGAGtgcgtgggattccagccacaatTTTGTGAGACCATCGAAGAG		TTTGTGAGACCATCGAAGAGaagagatattctgccatgccTTTGTGAGACCATCGAAGAG
TTTGTGAGACCATCGAAGAGtagaatcttccccagtactggtTTTGTGAGACCATCGAAGAG		TTTGTGAGACCATCGAAGAGcgtgtcccagggtgtgcttgTTTGTGAGACCATCGAAGAG
		TTTGTGAGACCATCGAAGAGaagtcagcttagctctcatcTTTGTGAGACCATCGAAGAG
		TTTGTGAGACCATCGAAGAGcagtaaagtcacgtggctttTTTGTGAGACCATCGAAGAG
		TTTGTGAGACCATCGAAGAGatgcatgcactgcctcagtgTTTGTGAGACCATCGAAGAG
		TTTGTGAGACCATCGAAGAGgaaaagatgaaggcagcctgTTTGTGAGACCATCGAAGAG
		TTTGTGAGACCATCGAAGAGcagatgttttggtgcaacttTTTGTGAGACCATCGAAGAG
		TTTGTGAGACCATCGAAGAGcacaaagaaaagaagctgggTTTGTGAGACCATCGAAGAG
